## Control of skeletal morphogenesis by the Hippo-YAP/TAZ pathway

Hannah K Vanyai<sup>1,2</sup>, Fabrice Prin<sup>1</sup>, Oriane Guillermin<sup>1</sup>, Bishara Marzook<sup>1</sup>, Stefan Boeing<sup>1</sup>, Alexander Howson<sup>1</sup>, Rebecca E Saunders<sup>1</sup>, Thomas Snoeks<sup>1</sup>, Michael Howell<sup>1</sup>, Timothy J Mohun<sup>1</sup>, Barry Thompson<sup>1,3\*</sup>

<sup>1</sup>The Francis Crick Institute  
1 Midland Rd, St Pancras,  
NW1 1AT, London,  
United Kingdom

<sup>2</sup>Current address: The Walter and Eliza Hall Institute  
1G Royal Parade, Parkville  
3052, Victoria,  
Australia

<sup>3</sup>EMBL Australia  
Department of Cancer Biology & Therapeutics  
The John Curtin School of Medical Research  
The Australian National University  
131 Garran Rd, Acton,  
2601, Canberra,  
Australia

\*Corresponding author:  
barry.thompson@anu.edu.au

## Abstract

The Hippo-YAP/TAZ pathway is an important regulator of tissue growth, but can also control cell fate or tissue morphogenesis. Here we investigate the function of the Hippo pathway during the development of cartilage, which forms the majority of the skeleton. Previously, YAP was proposed to inhibit skeletal size by repressing chondrocyte proliferation and differentiation. We find that, *in vitro*, *Yap/Taz* double knockout impairs chondrocyte proliferation, whilst constitutively nuclear *nls-YAP5SA* accelerates proliferation, in line with the canonical role of this pathway in most tissues. However, *in vivo*, cartilage-specific knockout of *Yap/Taz* does not prevent chondrocyte proliferation, differentiation, or skeletal growth, but rather results in various skeletal deformities including cleft palate. Cartilage-specific expression of *nls-YAP5SA* or knockout of *Lats1/2* do not increase cartilage growth but instead lead to catastrophic malformations resembling chondrodysplasia or achondrogenesis. Physiological YAP target genes in cartilage include *Ctgf*, *Cyr61* and several matrix remodelling enzymes. Thus, YAP/TAZ activity controls chondrocyte proliferation *in vitro*, possibly reflecting a regenerative response, but is dispensable for chondrocyte proliferation *in vivo*, and instead functions to control cartilage morphogenesis via regulation of the extracellular matrix.

## Introduction

The Hippo signalling pathway was discovered as a potent regulator of organ size in *Drosophila*, and is conserved in mammals (Harvey and Tapon, 2007; Moya and Halder, 2019; Pan, 2007; Yu et al., 2015; Zheng and Pan, 2019). This tumour suppressor pathway consists of a core kinase cascade in which the upstream kinase MST1/2 (Hippo in *Drosophila*) phosphorylates the downstream kinase LATS1/2 (Warts in *Drosophila*), which in turn phosphorylates and inactivates the pro-proliferative transcriptional co-activators YAP (Yes-associated protein, also known as YAP1) and TAZ (transcriptional coactivator with PDZ-binding motif, also known as WWTR1), which act via TEAD-family DNA binding transcription factors to control gene expression in response to a variety of upstream inputs (Harvey and Tapon, 2007; Moya and Halder, 2019; Pan, 2007; Yu et al., 2015; Zheng and Pan, 2019).

In parallel with regulation via LATS1/2 kinases, YAP/TAZ can also be regulated by other inputs, such as direct phosphorylation by Src family kinases (Elbediwy et al., 2018; Elbediwy et al., 2016; Li et al., 2016b; Si et al., 2017).

Genetically engineered mouse models have established that murine YAP/TAZ primarily function to promote cell proliferation and survival in many different tissues, particularly during regenerative growth or tumour formation in the intestine (Cai et al., 2015; Cai et al., 2010; Cotton et al., 2017; Gregorieff et al., 2015; Zhou et al., 2011), skin (Debaugnies et al., 2018; Elbediwy et al., 2016; Schlegelmilch et al., 2011; Vincent-Mistiaen et al., 2018; Zhang et al., 2011), lung (Lange et al., 2015; Lin et al., 2017), heart (Heallen et al., 2013; Heallen et al., 2011; Leach et al., 2017; Lin et al., 2016; Monroe et al., 2019; Xin et al., 2013) and liver (Dong et al., 2007; Lee et al., 2010; Lu et al., 2018; Lu et al., 2010; Zender et al., 2006; Zhang et al., 2010) as well as breast ducts during pregnancy (Chen et al., 2014). In addition to controlling tissue growth, there is evidence that Hippo-YAP/TAZ signalling has a function in controlling cell fate decisions and cell differentiation during development, including specification of trophectoderm in early blastocyst (Cockburn et al., 2013; Nishioka et al., 2009) as well as during later patterning of several tissues including the lung (Lange et al., 2015; Mahoney et al., 2014; Szymaniak et al., 2015), neural crest (Manderfield et al., 2015; Wang et al., 2016a), mesenchyme (Cotton et al., 2017), lymphatics (Cho et al., 2019), and pancreas (Rosado-Olivieri et al., 2019). Interestingly, the Hippo-YAP/TAZ pathway can have a third and distinct function in regulating morphogenesis and organ shape during development of some mammalian tissues, such as kidney (Reginensi et al., 2016; Reginensi et al., 2015; Reginensi et al., 2013), and blood vessels (Kim et al., 2017; Neto et al., 2018; Wang et al., 2017).

The role of the Hippo-YAP/TAZ pathway during development of the skeleton remains poorly understood. Endochondral skeletal development begins with formation of cartilage (chondrogenesis), whose size and shape largely prefigures that of the resulting bony skeleton and, consequently, the size and shape of the entire body. *In vitro*, YAP was found to promote proliferation of cartilage-derived chondrocytes, suggesting a possible role of YAP in cartilage growth (Deng et al., 2016; Yang et al., 2016; Zhong et al., 2013). *In vivo*, cartilage-specific expression of wild-type YAP

protein under the control of the *Col2a1* promoter in transgenic mice did not affect skeletal size or shape when heterozygous, but surprisingly reduced skeletal size when homozygous (Deng et al., 2016). Conversely, cartilage-specific conditional knockout of *Yap*<sup>flox/flox</sup> with *Col2a1-Cre* was reported to increase skeletal size (Deng et al., 2016). The authors concluded that YAP primarily functions to promote early chondrocyte proliferation and inhibit chondrocyte differentiation/maturation (Deng et al., 2016). A second study reported that post-natal activation of YAP/TAZ via cartilage-specific knockout of *Mob1a/b* led to reduced skeletal size, owing to YAP/TAZ inhibiting both chondrocyte proliferation and differentiation/maturation (Goto et al., 2018). YAP and TAZ were proposed to inhibit differentiation/maturation via direct repression of *Sox9*, an important regulator of chondrocyte cell fate (Goto et al., 2018), a model that conflicts with the general function of YAP/TAZ as transcriptional activators.

Since these initial studies did not examine complete loss- and gain-of-function of Hippo signalling during embryonic development, which requires double conditional knockouts of both *Yap* and *Taz*, or both *Lats1* and *Lats2* genes, we sought to re-examine the consequences of full activation and inactivation of the Hippo pathway in chondrocyte proliferation *in vitro* and during cartilage development *in vivo*. The resulting phenotypes are stronger than those previously reported and allow us to clarify the existing models of Hippo pathway function in cartilage. We find that YAP/TAZ are necessary and sufficient to drive chondrocyte proliferation *in vitro*, but are dispensable for chondrocyte proliferation *in vivo*. We further find that chondrocyte YAP/TAZ are not required to regulate the expression of *Sox9* and are largely dispensable for chondrocyte differentiation and subsequent endochondral ossification to produce bone. Instead, YAP/TAZ primarily function to regulate skeletal morphology, with their loss-of-function leading to abnormally shaped skeletal elements and cleft palate, and their gain-of-function generating severe skeletal malformations. These defects are driven by changes in cartilage remodelling due to dysregulation of the direct YAP/TAZ targets *Ctgf* and *Cyr61* as well as matrix proteases. Thus, the primary role of Hippo-YAP/TAZ signalling in cartilage development is in control of tissue morphogenesis, rather than in control of cell proliferation or cell fate.

## Results

### YAP and TAZ positively regulate proliferation in primary chondrocytes *in vitro*

To examine the consequence of complete loss of the YAP and TAZ co-activators on *in vitro* proliferation of primary chondrocytes, we crossed  $Yap^{f/f}Taz^{f/+}Col2a1cre^{+ve}$  with  $Yap^{f/f}Taz^{f/f}$  mice to produce litters containing  $Yap^{f/f}Taz^{f/f}Col2a1cre^{+ve}$  animals. Litters were harvested at embryonic day (E)17.5 and primary chondrocytes were generated from the ribs and sterna of pups. Whilst control chondrocytes plated at low density (3000 cells/well of a 96-well plate) flattened and proliferated,  $Yap^{f/f}Taz^{f/f}Col2a1cre^{+ve}$  chondrocytes at the same density exhibited an almost a complete arrest in proliferation and maintained a strikingly rounder morphology, consistent with the known roles of YAP/TAZ in regulating integrin adhesion in cell culture (Nardone et al., 2017) or may indicate a difference in rate of differentiation (Fig. 1A,B; Fig. S1A-C). Interestingly, chondrocytes with one functional *Taz* allele ( $Yap^{f/f}Taz^{f/+}Col2a1cre^{+ve}$ ) displayed a similar pattern of proliferation arrest and morphological change, suggesting that YAP may be the primary regulator of cell proliferation and morphology in chondrocytes *in vitro*. The presence of the *Col2a1cre^{+ve}* allele alone had no substantive effect on proliferation of P0 primary chondrocytes (Fig. S1A,B). Notably, apoptosis was unchanged in all genotypes (data not shown).

We next examined the effect of increased YAP activity in primary chondrocytes, by using the cre-inducible *nls-YAP5SA* allele. This encodes a human YAP protein in which the LATS-target serines are modified to alanines, rendering the YAP protein refractory to negative regulation and cytoplasmic retention by the LATS1/2 kinases (Vincent-Mistiaen et al., 2018). A nuclear localisation signal (*nls*) further drives YAP to the nucleus, altogether resulting in the *nls-YAP5SA<sup>KI</sup>* allele encoding a constitutively nuclear YAP protein (Vincent-Mistiaen et al., 2018). Chondrocytes were isolated from the ribs and sterna of E17.5 pups carrying the *nls-YAP5SA<sup>KI</sup>* allele and the tamoxifen-inducible, chondrocyte-specific *Col2a1creERT* allele. *nls-YAP5SA<sup>KI/+</sup>Col2a1creERT<sup>+ve</sup>* chondrocytes treated with 1  $\mu$ M of 4-hydroxytamoxifen 24 hr after plating exhibited an increased rate of proliferation and more flattened morphology as compared with the chondrocytes treated with vehicle control (Fig.

1C,D). Together, these data demonstrate that YAP/TAZ are necessary and sufficient to control chondrocyte proliferation and morphology *in vitro*.

### **Complete loss of YAP/TAZ in chondrocytes results in lethal skeletal deformities *in vivo***

A previous study (Deng et al., 2016) qualitatively described a modest increase in mineralised bone length and body size in  $Yap^{fl/fl} Col2a1cre^{+ve}$  single conditional knockout pups at late gestation. We wondered if the presence of the YAP homologue TAZ in these animals may be sufficient to compensate for the knockout of the *Yap* gene and therefore may mask a requirement for Hippo effectors in the positive regulation of proliferation in chondrocytes *in vivo*. However, despite the extreme *in vitro* proliferation defect in primary chondrocytes isolated from E17.5  $Yap^{fl/fl} Taz^{fl/fl} Col2a1cre^{+ve}$  animals, the size of both the body and skeleton of these mutants was surprisingly normal at this stage of gestation, suggesting a profound disconnect between the *in vitro* and *in vivo* chondrocyte phenotypes for these animals (Fig. 2A-J). However,  $Yap^{fl/fl} Taz^{fl/fl} Col2a1cre^{+ve}$  animals were not present at weaning, in contrast to the presence of animals carrying all other mutant allele combinations examined (including  $Yap^{fl/fl} Taz^{+/+} Col2a1cre^{+ve}$ ,  $Yap^{+/+} Taz^{fl/fl} Col2a1cre^{+ve}$ ,  $Yap^{fl/+} Taz^{fl/fl} Col2a1cre^{+ve}$  and  $Yap^{fl/fl} Taz^{fl/+} Col2a1cre^{+ve}$ ), or the  $Col2a1cre^{+ve}$  allele alone, at expected Mendelian frequencies (Fig. S2A-D). Quantification of E17.5 genotypes revealed the presence of the double homozygous mutants at Mendelian numbers (data not shown), suggesting that they likely perish in the early neonatal period. On gross examination, E17.5  $Yap^{fl/fl} Taz^{fl/fl} Col2a1cre^{+ve}$  pups were hunched compared to their littermate controls, with a flattened rostrum at the dorsal surface of the snout (Fig. 2A,F). Skeletal preparations of these animals revealed subtle skeletal malformations including spine deformities, a barrel-like ribcage and sternum and a loss of convex shape of the nasal bone (Fig. 2B,C,G,H). Compared to the lateral emergence of the ribs from the spine in controls, the ribs of  $Yap^{fl/fl} Taz^{fl/fl} Col2a1cre^{+ve}$  pups emerged slightly to the anterior before angling sharply down towards the posterior (Fig. 2C,H). The femur and tibia of the hindlimb of mutant pups were slightly longer than those of controls (Fig. 2D,E,I,J,K). The tibia furthermore exhibited a distinct bend compared with the control (Fig. 2E,J). Deng et al. previously described the ossified region of the limbs of  $Yap^{fl/fl} Col2a1cre^{+ve}$  single

mutants as being longer than controls (Deng et al., 2016). We therefore scanned E17.5 animals by microCT and measured the length of the mineralised component of the hind limb (Fig. 2L,M). There was no difference in the length of mineralisation or bone volume by this analysis, though calcium density was slightly increased in *Yap<sup>fl/fl</sup>Taz<sup>fl/fl</sup>Col2a1cre<sup>+ve</sup>* (Fig. 2L,M & data not shown), indicating that the defects in cartilage morphogenesis do not have a large impact on skeletal size or endochondral osteogenesis in these mutants. Thus, the *Yap<sup>fl/fl</sup>Taz<sup>fl/fl</sup>Col2a1cre<sup>+ve</sup>* mutants did not strongly affect cartilage growth or subsequent osteogenesis, indicating that the primary requirement for YAP/TAZ is in cartilage morphogenesis. We note that phenotyping at E17.5 does not discern the direct early effects of YAP/TAZ deletion and that, to address this issue, earlier stages of development would need to be examined.

### Cleft palate in the absence of YAP/TAZ in chondrocytes

Interestingly, the skeletal preparations further revealed a cleft palate in some *Yap<sup>fl/fl</sup>Taz<sup>fl/fl</sup>Col2a1cre<sup>+ve</sup>* animals, which would contribute to their neonatal lethality (Fig. 3A,B). The palate initially develops as bilateral palatal shelves growing horizontally from the maxilla between E10.5-12.5. At E13.5, the palatal shelves lie vertically alongside the tongue and undergo a rapid process of elevation around E14.0, which requires the tongue to drop by the movement of the lower jaw opening. At E14.5, the palatal shelves are positioned vertically above the tongue and continue to grow toward the midline where they meet and fuse close by around E15.5. Cleft palate can occur by failure of any of these stages of development. Examination of the palate by gross dissection at E17.5 indicated that, compared to littermate controls (Fig. 3C) *Yap<sup>fl/fl</sup>Taz<sup>fl/fl</sup>Col2a1cre<sup>+ve</sup>* mutants displayed either no cleft (Fig. 3D), a narrow cleft with elevated palatal shelves (Fig. 3E) or a wide cleft with unelevated palatal shelves (Fig. 3F), at approximately even incidence. To determine the developmental origin of the cleft palate phenotype, we performed high resolution episcopic microscopy (HREM) on heads of E17.5 pups and generated 3-dimensional models of the head by volume rendering. Examination of lateral cutaways of the volume-rendered HREM images revealed that the shape of the endochondral bones of the cranial base was deformed in all *Yap<sup>fl/fl</sup>Taz<sup>fl/fl</sup>Col2a1cre<sup>+ve</sup>* mutants (Fig. 3G-J). Of the three bones that contribute to the palate, the palatal processes of the palatine



and maxillary bones are both derived from intramembranous ossification rather than endochondral ossification, leading us to examine the region of the pterygoid process, which develops by secondary endochondral ossification. The basisphenoid cartilage of the cranial base was wider in all three classes of mutant palates compared to control, whilst the pterygoid processes angled towards the midline in controls and non-cleft mutants (Fig. 3K,L) but angled laterally in both classes of cleft mutants (Fig. 3M,N). The basisphenoid measured significantly wider in the frontal plane (Fig. 3O). The tongue was tightly wedged in the palatal space in the cleft palate mutants (Fig. 3I,J,M,N), suggesting that the cleft palate phenotype may be a secondary consequence of the tongue physically impeding the elevation and/or closure of the palatal shelves. This can occur due to a failure of the lower jaw to drop during palate elevation because of changes in the morphology of the lower jaw, such as a shortening of the mandibles (Ricks et al., 2002). Though the mandibles themselves develop through intramembranous ossification, their growth is guided by the rod-like Meckel's cartilage around which they grow. However, the mandibles of *Yap<sup>fl/fl</sup>Taz<sup>fl/fl</sup>Col2a1cre<sup>+ve</sup>* mutants with the most severe (unelevated) cleft at E17.5 were indistinguishable compared to controls (Fig. 3P,Q). We therefore examined during and directly after the elevation stage of palate development by HREM at E14.5 and E15.5. At E14.5, the palatal shelves of four of five control (*Col2a1cre<sup>-ve</sup>*) fetuses were fully elevated with the remaining foetus having one palatal shelf unelevated, in contrast to all five *Yap<sup>fl/fl</sup>Taz<sup>fl/fl</sup>Col2a1cre<sup>+ve</sup>* mutants having unelevated palatal shelves (Fig. 3R). Meckel's cartilage was extracted using object thresholding from the E14.5 HREM images, which revealed abnormal morphology and anterior-posterior shortening of Meckel's cartilage in all five *Yap<sup>fl/fl</sup>Taz<sup>fl/fl</sup>Col2a1cre<sup>+ve</sup>* mutants compared to five control (*Col2a1cre<sup>-ve</sup>*) Meckel's cartilages (Fig. 3S). By E15.5, the four mutants examined had elevated palatal shelves (n = 2) or one shelf elevated (n = 2), compared to fully elevated palatal shelves in three controls (*Col2a1cre<sup>-ve</sup>*; data not shown). These data suggest that the cleft palate observed in two thirds of *Yap<sup>fl/fl</sup>Taz<sup>fl/fl</sup>Col2a1cre<sup>+ve</sup>* E17.5 pups may be caused by abnormal morphology of Meckel's cartilage, and therefore the lower jaw, at the developmental timepoint critical for palate elevation, which may prevent the tongue from lowering and lead to a delay in or prevention of elevation. Interestingly, the defects in Meckel's cartilage can be overcome in *Yap<sup>fl/fl</sup>Taz<sup>fl/fl</sup>Col2a1cre<sup>+ve</sup>* animals, resulting in normal mandibular morphology at E17.5 and even normal



palate morphology in some mutants. Thus, loss of YAP and TAZ causes defects in Meckel's cartilage as well as the cartilages of the cranial base, leading to defects in palate closure and resulting in cleft palate and neonatal lethality.

### **YAP/TAZ are not required for cell proliferation in the cartilage growth plate *in vivo***

To investigate the cellular basis for the YAP/TAZ loss-of-function phenotype in cartilage, we focused on the growth plate of the proximal tibia, a commonly examined cartilage structure for the study of chondrocyte proliferation and differentiation *in vivo*. The growth plate provides a pseudotemporal snapshot of chondrogenesis (Li et al., 2016a), enabling simultaneous examination of the different stages of chondrocyte development from round proliferating chondrocytes to columnar proliferating chondrocytes, after which they stop proliferating and undergo hypertrophy to become pre-hypertrophic, then hypertrophic and finally terminally differentiated chondrocytes. Some terminally differentiated chondrocytes undergo apoptosis whilst the remainder transdifferentiate into osteoblasts (Yang et al., 2014; Zhou et al., 2014) to make way for mineralised bone. Stage-specific defects in chondrogenesis can be inferred from the variation in size of growth plate zones, gene expression domains or regions of proliferation or apoptosis (Hallett et al., 2019). *Yap* and *Taz* are expressed throughout the growth plate at all stages of chondrogenesis, with both nuclear and cytoplasmic immunostaining apparent throughout (Fig. S3A,B). H&E staining of sections of E17.5 control (*Col2a1cre*<sup>-ve</sup>), single mutants (*Yap*<sup>fl/fl</sup>*Taz*<sup>+/+</sup>*Col2a1cre*<sup>+ve</sup>, *Yap*<sup>+/+</sup>*Taz*<sup>fl/fl</sup>*Col2a1cre*<sup>+ve</sup>), animals retaining one intact copy of either *Yap* or *Taz* (*Yap*<sup>fl/+</sup>*Taz*<sup>fl/fl</sup>*Col2a1cre*<sup>+ve</sup> and *Yap*<sup>fl/fl</sup>*Taz*<sup>+/+</sup>*Col2a1cre*<sup>+ve</sup>, respectively) and the double mutant (*Yap*<sup>fl/fl</sup>*Taz*<sup>fl/fl</sup>*Col2a1cre*<sup>+ve</sup>) revealed that only the growth plate of the double mutant was changed in total length (Fig. 4A) and length of each growth plate zone (Fig. 4B) compared to the control. The presence of the *Col2a1cre*<sup>+ve</sup> allele alone also did not affect total growth plate length or the size of individual zones (Fig. S4). In contrast, there was an expansion of the round proliferating zone and the pre-hypertrophic/hypertrophic zone in the *Yap*<sup>fl/fl</sup>*Taz*<sup>fl/fl</sup>*Col2a1cre*<sup>+ve</sup> growth plates compared to control, suggesting defects in these stages of chondrogenesis (Fig. 4A,B). Proliferation, as measured by the percentage Ki67-staining cells (compared to

total cells marked by Eosin staining of the nuclei) in each chondrocyte zone of the growth plate, was unchanged in *Yap<sup>fl/fl</sup>Taz<sup>fl/fl</sup>Col2a1cre<sup>+ve</sup>* samples compared to control (Fig. 4C,D). However, the density of cells per region counted was reduced in the mutants (Fig. 4E). To confirm these results, proliferation was measured by EdU incorporation versus total DAPI stained nuclei and again there was no change while cell density was reduced (Fig. 4F-H). TUNEL staining revealed no apoptosis in either control or mutant samples (not shown), demonstrating that the difference in cell density in *Yap<sup>fl/fl</sup>Taz<sup>fl/fl</sup>Col2a1cre<sup>+ve</sup>* samples is not due to loss of cells. Binning the number of cells down the longitudinal length of the growth plate in control and *Yap<sup>fl/fl</sup>Taz<sup>fl/fl</sup>Col2a1cre<sup>+ve</sup>* samples revealed approximately equivalent cell numbers in the proximal two thirds of the growth plate and a slight increase in cells in the mutant in the most distal regions (Fig. 4I), however, the overall total number of cells was not significantly different (Fig. 4J), suggesting no extensive delay in differentiation. These experiments show that in the mutants there is: lower cell density, but approximately equivalent numbers of cells and equivalent rates of proliferation, across a greater area, with no change in apoptosis. Together these results suggest that there is an increase in extracellular space (i.e.: extracellular matrix) throughout the mutant growth plate as well as an expansion in length of the hypertrophic zone and, accordingly, staining with alcian blue confirmed an increase in total area of matrix and increased percentage of matrix versus cellular material in each region (Fig. 4K,L). Since cartilage morphogenesis involves the stage-specific and timely production and degradation of extracellular matrix proteins, the function of YAP/TAZ in chondrogenesis may relate to synthesis and/or remodelling of the extracellular matrix, rather than its canonical role in promoting cell proliferation.

### **Constitutive activation of YAP in chondrocytes does not affect cell proliferation but causes severe skeletal deformities *in vivo***

Two previous studies found that moderately increased YAP activity in chondrocytes either during embryonic development (Deng et al., 2016) or post-natal development (Goto et al., 2018) led to a proportional decrease in body size. Similarly, we found a decrease in body size when we expressed the nuclear-targeted YAP allele, *nls-YAP5SA*, in chondrocytes (*nls-YAP5SA<sup>Kl/+</sup>Col2a1cre<sup>+ve</sup>*), however, this phenotype was substantially more severe than the previously reported phenotypes and was

accompanied by catastrophic chondrodysplasia resembling achondrogenesis (Fig. 5A-F). Skeletal preparations revealed extremely dysmorphic skeletal elements throughout the body, including highly dysplastic facial bones, ectopic bone elements along the spine and abnormal rib cage and limbs (Fig. 5G-J). Since the limbs appeared less affected relative to the other skeletal elements, we examined the proximal growth plate of the tibia histologically (Fig. 5K). The growth plate in the *nls-YAP5SA<sup>Kl/+</sup>Col2a1cre<sup>+ve</sup>* tibia was approximately 30% smaller than the control and the total alcian blue stained-area was similarly reduced, though the relative size of each chondrocyte growth zone was unchanged (Fig. 5K-M). Proliferation was assessed by Ki67 staining (Fig. 5N) and no change was observed in any chondrocyte zone (Fig. 5O), once again in contrast to the increase in proliferation observed in primary chondrocytes *in vitro* (Fig. 1C,D). Apoptosis was also unchanged (data not shown). However, cell density was increased in *YAP5SA<sup>Kl/+</sup>Col2a1cre<sup>+ve</sup>* samples (Fig. 5P), suggesting decreased extracellular matrix in the intracellular spaces, mirroring the decreased cell density and increased percentage of area occupied by cartilage matrix in *Yap<sup>fl/fl</sup>Taz<sup>fl/fl</sup>Col2a1cre<sup>+ve</sup>* tibias (Fig. 4E,L). These results show that expression of a nuclear-targeted YAP protein in chondrocytes *in vivo* does not affect cell proliferation and instead causes severely abnormal cartilage morphogenesis and decreased size of skeletal elements, possibly via altering the extracellular matrix.

To confirm the biological relevance of the *nls-YAP5SA<sup>Kl/+</sup>Col2a1cre<sup>+ve</sup>* overexpression phenotype, we inactivated endogenous Hippo signalling through cartilage-specific conditional knockout of the upstream negative regulators of YAP, *Lats1* and *Lats2* (*Lats1/2<sup>fl/fl</sup>Col2a1cre<sup>+ve</sup>*). At E18.5, compared with *Col2a1cre<sup>-ve</sup>* control littermates, *Lats1/2<sup>fl/fl</sup>Col2a1cre<sup>+ve</sup>* pups once again had extremely severe chondrodysplasia that was highly similar to and more severe than that of *nls-YAP5SA<sup>Kl/+</sup>Col2a1cre<sup>+ve</sup>* mutants (Fig. 6A-J). Staining of tibias with alcian blue revealed that the *Lats1/2<sup>fl/fl</sup>Col2a1cre<sup>+ve</sup>* cartilaginous structure was strongly decreased in total area and intensity of staining compared to control tibias (Fig. 6K). However, a core of chondrocytes persisted throughout the length of the tibia (arrow in Fig. 6K), indicative of a failure of chondrocytes to completely differentiate and clear, through either apoptosis or transdifferentiation into osteoblasts (Yang et al., 2014; Zhou et al., 2014). Micro CT scanning of the tibias revealed the presence of

mineralised bone surrounding a persistent shaft of chondrocytes, albeit appearing non-uniform in its surface (Fig. 6L). These results confirm that the *nls-YAP5SA<sup>Kl/+</sup>Col2a1cre<sup>+ve</sup>* mutants are biologically relevant and demonstrate that suppression of YAP/TAZ activity in cartilage by the Hippo pathway is critical for cartilage morphogenesis and normal skeletal development.

### **Modulation of YAP/TAZ affects expression of matrix remodelling genes *in vivo***

Conflicting reports from previous studies concluded that YAP activity in chondrocytes functions primarily to either repress chondrocyte differentiation, by promoting Sox6 expression and repressing *Col10a1* (Deng et al., 2016; Goto et al., 2018) or to promote chondrocyte differentiation by repressing Sox9 (Deng et al., 2016; Goto et al., 2018). We therefore sought to re-examine the expression of COL10a1 (COLX) and SOX9 in tibial growth plates from our YAP/TAZ loss-of-function and gain-of-function animals. We saw an expansion of the COLX-staining domain in *Yap<sup>fl/fl</sup>Taz<sup>fl/fl</sup>Col2a1cre<sup>+ve</sup>* but only a slight reduction in domain size in *YAP5SA<sup>Kl/+</sup>Col2a1cre<sup>+ve</sup>* tibias (Fig. S5A-D), suggesting that the expansion of the COLX-stained hypertrophic zone may reflect a delay in differentiation rather than an effect of loss of direct regulation by YAP/TAZ. Strikingly, we found that the pattern and levels of expression of SOX9 was essentially normal in *Yap<sup>fl/fl</sup>Taz<sup>fl/fl</sup>Col2a1cre<sup>+ve</sup>* tibias and in *nls-YAP5SA<sup>Kl/+</sup>Col2a1cre<sup>+ve</sup>* tibias relative to total growth plate size (Fig. S5A-D). These results argue against an essential function for YAP/TAZ in regulating chondrocyte cell differentiation via direct repression of Sox9 or *Col10a1* gene expression. Nevertheless, we were able to detect a mild reduction of SOX9 and, to a much lesser extent, COLX stained area in our *Lats1/2<sup>fl/fl</sup>Col2a1cre<sup>+ve</sup>* tibial growth plates (Fig. S5E), similar to that reported for cartilage-specific knockout of *Mob1a/b* (Goto et al., 2018) – but these effects may be a secondary consequence of the highly abnormal morphology of these growth plates.

Descriptions of molecular functions of YAP and TAZ in chondrocytes have been derived predominantly from *in vitro* analyses (Deng et al., 2016; Goto et al., 2018). However, we describe here a significant departure in phenotypic outcomes *in vitro* compared to *in vivo*. Therefore, to more closely quantify the molecular consequences of YAP/TAZ modulation *in vivo*, we performed RTqPCR on laser

microdissected tibial growth plate sections. Compared to controls (*Col2a1cre*<sup>-ve</sup>), in *Yap*<sup>fl/fl</sup>*Taz*<sup>fl/fl</sup>*Col2a1cre*<sup>+ve</sup> growth plates, *Yap* and *Taz* expression was reduced by 75% (Fig. 7A). Contrary to the previous findings that YAP/TAZ represses *Sox9* or induces *Sox6* (Deng et al., 2016; Goto et al., 2018), we did not detect a substantial change in either *Sox9* expression or *Sox6* levels in the dKO growth plates (Fig. 7B).

The skeletal defects observed here in *Yap*<sup>fl/fl</sup>*Taz*<sup>fl/fl</sup>*Col2a1cre*<sup>+ve</sup> mutants are highly reminiscent of the skeletal phenotypes observed in mice carrying mutations in *Ctgf*, a known direct target of YAP/TAZ (Zhang et al., 2009; Zhao et al., 2008), including bowed tibia and ribs, unelevated cleft palate, abnormal Meckel's cartilage and increased ECM in the growth plate with an elongated pre-hypertrophic/hypertrophic zone (Ivkovic et al., 2003). We therefore examined expression of *Ctgf* and the closely related *Cyr61*, also a target of YAP/TAZ (Lai et al., 2011), and found a substantial reduction in expression of both genes in *Yap*<sup>fl/fl</sup>*Taz*<sup>fl/fl</sup>*Col2a1cre*<sup>+ve</sup> samples compared to controls (Fig. C). Strikingly, neither gene showed any decrease in the growth plates from *Yap*<sup>fl/fl</sup>*Taz*<sup>fl/+</sup>*Col2a1cre*<sup>+ve</sup> pups, which do not display any skeletal or lethal phenotypes, suggesting that dysregulation of *Ctgf*, perhaps with some contribution from a reduction in *Cyr61* levels, underlies the cartilage defects observed in *Yap*<sup>fl/fl</sup>*Taz*<sup>fl/fl</sup>*Col2a1cre*<sup>+ve</sup> mutants.

To explore the molecular basis for the increased amount of ECM in the *Yap*<sup>fl/fl</sup>*Taz*<sup>fl/fl</sup>*Col2a1cre*<sup>+ve</sup> mutants, we next examined the expression of genes encoding major cartilage ECM components, namely aggrecan (*Acan*), cartilage oligomeric matrix protein (*Comp*), *Col2a1* and *Col10a1*. We did not detect any significant change in expression of these genes (Fig. 7D), indicating that the increase in ECM area is not due to increased production of the matrix proteins. The differentiation of chondrocytes and the remodelling of cartilage into mineralised bone requires the activity of numerous proteases, including matrix metalloproteases (MMPs) and Cathepsin K (CTSK) and a decrease in protease activity can reduce the turnover of ECM proteins. Though we could not reliably detect transcripts of *Mmp9* or *Mmp13* – two key protease regulators of cartilage remodelling (Stickens et al., 2004; Vu et al., 1998) – we saw a reduction in *Ctsk* and *Mmp2* expression in *Yap*<sup>fl/fl</sup>*Taz*<sup>fl/fl</sup>*Col2a1cre*<sup>+ve</sup>, but not *Yap*<sup>fl/fl</sup>*Taz*<sup>fl/+</sup>*Col2a1cre*<sup>+ve</sup>, mutant samples (Fig. 7E). CTSK cleaves the major cartilage ECM components collagen II and aggrecan (Hou

et al., 2003; Kafienah et al., 1998), suggesting the increased area of ECM in double homozygous mutants may represent accumulated ECM proteins due to decreased rate of degradation by CTSK, MMP2 and perhaps other ECM proteases.

We next confirmed the RTqPCR reduction in *Ctgf* and *Cyr61* by *in situ* hybridisation and saw comparable reductions in signal (Fig. 7F,G). Unexpectedly, we did not observe a strong signal for *Ctgf* in its published predominant expression domain, namely the pre-hypertrophic/hypertrophic zone (Ivkovic et al., 2003); however, this may be a histological artefact of the *in situ* protocol which does not preserve cellular material of this region well.

To examine the molecular consequence of YAP hyperactivation, we performed RTqPCR analysis on microdissected tibial sections from control (*Col2a1cre<sup>-ve</sup>*) and *YAP5SA<sup>Kl/+</sup>Col2a1cre<sup>+ve</sup>* E17.5 samples. We confirmed increased *Yap* levels to almost twice that of control and no change in *Taz* expression (Fig. 7H). Here we saw no change to *Sox9* or *Sox6* levels (Fig. 7I). In contrast, *Ctgf* levels were up 3-fold in *YAP5SA<sup>Kl/+</sup>Col2a1cre<sup>+ve</sup>* growth plates, mirroring the decrease we observed in *Yap<sup>fl/fl</sup>Taz<sup>fl/fl</sup>Col2a1cre<sup>+ve</sup>* samples, although interestingly *Cyr61* was unchanged (Fig. 7J). Of the ECM component genes examined, *Col10a1* was significantly reduced (Fig. 7K) and though neither *Mmp2* nor *Ctsk* showed a significant change in *YAP5SA<sup>Kl/+</sup>Col2a1cre<sup>+ve</sup>* samples, there was a substantial increase in *Mmp16* expression (Fig. 7L). MMP16 is a membrane-tethered MMP capable of degrading type II collagen and dual deletion of *Mmp16* and the closely related *Mmp14* in mice results in increased ECM accumulation in the femoral growth plate (Shi et al., 2008). This implies a reciprocal mechanism in our YAP/TAZ loss- and gain-of function mutants with regards to extracellular matrix remodelling in the cartilage through modulation of CTGF and CYR61 as well as various matrix remodelling enzymes.

Thus, our findings refine the current model, namely that YAP and TAZ control cartilage development exclusively via direct regulation of *Sox9*, and support the notion that regulation of cartilage morphogenesis, particularly by remodelling the extracellular matrix through regulation of *Ctgf*, *Cyr61* and various ECM proteases, is a primary physiological function for Hippo-YAP/TAZ signalling in this tissue.



## Discussion

In this study, we have identified a striking discrepancy between *in vitro* and *in vivo* functions of the Hippo-YAP/TAZ pathway in chondrocytes. Whilst primary cultured chondrocytes *in vitro* responded to YAP/TAZ loss-of-function or YAP gain-of-function according to the canonical understanding of YAP/TAZ being positive regulators of cell proliferation, identical genetic alterations *in vivo* did not affect chondrocyte proliferation. Further characterisation of the phenotypes of these animals revealed that YAP/TAZ are also not essential to regulate chondrocyte cell differentiation *in vivo*, and instead function primarily to control cartilage morphogenesis, including via regulation of the extracellular matrix. Our findings have medical relevance because ~40% of patients in a family carrying a loss-of-function mutation in the *YAP1* gene have been reported to have cleft palate/lip/uvula at birth (Williamson et al., 2014) and our results indicate that these mutations may be causative, as our mouse *Yap/Taz* knockouts produce strongly penetrant cleft palate and complete neonatal lethality. Furthermore, skeletal malformations, including achondrogenesis and chondrodysplasia, are common but still poorly understood birth defects in humans (Feldkamp et al., 2017; Swarr and Reid Sutton, 2010) and our results implicate loss of Hippo pathway signalling as potentially causative, as the mouse *Lats1/2* knockouts and *Yap* constitutively active mutants exhibit a catastrophically malformed cartilage and skeleton at the end of gestation.

Our findings help resolve the conflicting reports for Hippo pathway function in regulating chondrocyte cell proliferation. YAP/TAZ have been reported widely as positive regulators of cell proliferation in chondrocytes *in vitro* (Deng et al., 2016; Yang et al., 2016; Zhong et al., 2013) and in the mouse prechondrocytic cell line ATDC5 *in vitro* (Yang et al., 2017). In one exception, Goto et al. report that activation of YAP/TAZ by depletion of *MOB1a/b* in the human chondrosarcoma cell line H-EMC-SS resulted in a reduction of proliferation (Goto et al., 2018). This *in vitro* observation agrees with the reduced proliferation they observed in the growth plates of the shortened limbs of adult mice with neonatal-deletion of *Mob1a/b*, but is in contrast with the study by Deng et al., who described increased proliferation in YAP transgenic-overexpressing late-gestation pups, despite having a substantially smaller overall body size (Deng et al., 2016). We find no change in cell proliferation *in vivo*



upon modulation of YAP/TAZ activity in *Yap<sup>fl/fl</sup>Taz<sup>fl/fl</sup>Col2a1cre<sup>+ve</sup>* pups or in *nls-YAP5SA<sup>Kl/+</sup>Col2a1cre<sup>+ve</sup>* mutants compared with controls and we instead observe changes in cell density and the ECM *in vivo*. Thus, while chondrocytes in culture depend strongly on YAP/TAZ for proliferation (which could reflect a program of tissue regeneration after damage), chondrocytes *in vivo* employ Hippo-YAP/TAZ signalling primarily to regulate morphogenesis during development.

The two known direct targets of YAP/TAZ, *Ctgf* and *Cyr61*, have well-documented roles in cartilage development (O'Brien and Lau, 1992; Wong et al., 1997). CTGF has been shown to bind to ECM components including aggrecan (Aoyama et al., 2009) as well as to cell surface integrins (Nishida et al., 2007) and a range of growth factors. The defects observed here in *Yap<sup>fl/fl</sup>Taz<sup>fl/fl</sup>Col2a1cre<sup>+ve</sup>* mutant animals closely phenocopy the defects described in *Ctgf* knockout animals, including malformed Meckel's cartilage and cleft palate (Ivkovic et al., 2003). The decrease in *Ctgf* mRNA levels to ~25% of control suggests that loss of *Ctgf* is a major contributor to the *Yap<sup>fl/fl</sup>Taz<sup>fl/fl</sup>Col2a1cre<sup>+ve</sup>* skeletal defects. Interestingly, 2-fold overexpression of *Ctgf* resulted in an overall larger body size of animals (Tomita et al., 2013), suggesting that increased *Ctgf* expression in our *nls-YAP5SA<sup>Kl/+</sup>Col2a1cre<sup>+ve</sup>* mutants is not the only YAP target affected here to cause the observed catastrophic chondrodysplasia in those mutants. Overexpression of *Cyr61* in chondrocytes leads to chondrodysplasia (Akiyama et al., 2004; Zhang et al., 2016). However, we did not detect an increase in *Cyr61* expression in our *nls-YAP5SA<sup>Kl/+</sup>Col2a1cre<sup>+ve</sup>* mutant animals, once again supporting the view that *Ctgf* and *Cyr61* are important YAP/TAZ targets in cartilage, yet there may be additional target genes that contribute to the phenotypes observed.

A previous report concluded that a major function of YAP/TAZ in cartilage development is to inhibit chondrocyte differentiation by direct transcriptional repression of the *Sox9* gene (Deng et al., 2016; Goto et al., 2018). In contrast, in chondrocytes *in vitro*, *Sox9* mRNA levels have been reported to be both positively (Li et al., 2018) or negatively (Karystinou et al., 2015; Yang et al., 2017) regulated by YAP. The phenotype of the *nls-YAP5SA* overexpression mutant reported here bears some resemblance to the published phenotype of *Sox9<sup>fl/fl</sup>Col2a1Cre<sup>+ve</sup>* pups (Akiyama et al., 2002) and to animals with chondrocyte-specific expression of

constitutively active  $\beta$ -catenin (Akiyama et al., 2004). However, our results argue against an essential and physiological role for YAP/TAZ in directly regulating Sox9 gene expression during development, as neither our *Yap<sup>fl/fl</sup>Taz<sup>fl/fl</sup>Col2a1cre<sup>+ve</sup>* double knockout or *nls-YAP5SA<sup>KI/+</sup>Col2a1cre<sup>+ve</sup>* overexpressing animals exhibited a change of Sox9 expression by RTqPCR (Fig. 7B,I). Furthermore, SOX9 immunostaining in tibial growth plates of these mutants was not changed relative to the overall smaller size of the growth plate (Fig. S5A-D). Thus, the primary physiological function of YAP/TAZ during embryonic cartilage development is not to regulate chondrocyte differentiation via Sox9 modulation, but rather to direct cartilage morphogenesis through regulation of *Ctgf* and *Cy61* as well as other target genes. The reduced Sox9 expression in our *Lats1/2<sup>fl/fl</sup>Col2a1cre<sup>+ve</sup>* mutants may reflect an extreme scenario in which both YAP and TAZ are strongly activated, possibly relevant to the regenerative response, rather than normal development (Fig S5E).

Given that chondrocytes secrete large amounts of specialised Collagen II- and Aggrecan-based extracellular matrix material to produce cartilage, it is plausible that the Hippo pathway functions to sense and regulate extracellular matrix synthesis and/or remodelling. This concept is consistent with the known function of Integrins in binding to the extracellular matrix and transducing signals via Hippo-YAP/TAZ in other tissues such as skin (Elbediwy et al., 2016), pancreas (Mamidi et al., 2018), tooth (Hu et al., 2017), blood vessels (Wang et al., 2016b), as well as in mesenchymal stem cells (Sabra et al., 2017; Tang et al., 2013), osteoblasts (Kaneko et al., 2014), and cancer cells (Kim and Gumbiner, 2015; Wong et al., 2016). Interestingly, matrix metalloprotease enzymes are downstream target genes of YAP that can be induced upon Integrin binding to stiff matrix substrates (Chakraborty et al., 2017; Nukuda et al., 2015) or dense matrix (Stanton et al., 2019). Our results show that YAP/TAZ can positively regulate expression of *Ctsk*, *Mmp2* and *Mmp16* in addition to *Ctgf* and *Cyr61*. In particular, induction of *Mmp16* along with *Ctgf* in the *YAP5SA<sup>KI/+</sup>Col2a1cre<sup>+ve</sup>* samples could contribute to the chondrodysplasia phenotype observed. Consistent with our findings, a recent study has suggested that YAP/TAZ mediates TGF- $\beta$ -induction of bone matrix remodelling factors *Ctsk*, *Mmp13* and *Mmp14* (Kegelman et al., 2020). Thus, chondrocytes may also employ the Hippo-YAP/TAZ pathway to sense mechanical forces acting via the extracellular

matrix and regulate the developmental remodelling response via *Ctgf*, *Cyr61* and several matrix remodelling enzymes. In support of this notion, a recent study has demonstrated that YAP localisation and activity in the embryonic cartilaginous humerus is depended on mechanical stimulation derived from the surrounding muscle (Shea et al., 2020). Our findings also have important medical relevance, further implicating the Hippo-YAP/TAZ pathway in human birth defects including chondrodysplasia and cleft palate (Williamson et al., 2014).

## Materials and Methods

### Mice

All animal (*Mus musculus*) experiments were carried out in accordance with the United Kingdom Animal Scientific Procedures Act (1986) and UK Home Office regulations under project license numbers 70/7926 and PDCC6E810. The *Yap<sup>fl</sup>* and *Taz<sup>fl</sup>* (*Wwtr1fl*) (Gruber et al., 2016), *nls-YAP5SA<sup>Kl</sup>* (Vincent-Mistiaen et al., 2018), *Lats<sup>fl</sup>* and *Lats2<sup>fl</sup>* (Yi et al., 2016), *Col2a1cre* (Ovchinnikov et al., 2000) and *Col2a1cre-ERT* (Nakamura et al., 2006) have all been previously described. For timed matings, embryonic day (E)0.5 was designated as midday following the morning of finding the vaginal plug. All mice were maintained on a mixed, predominantly C57Bl/6J background.

### Primary chondrocyte culture

Primary chondrocytes from the ribs and sterna were isolated essentially as described previously (Mirando, 2014). Briefly, the ribs and sterna of P0 for wildtype compared to *Col2a1cre+ve* pups or E17.5 pups for all other genotypes were dissected and excess overlying musculature removed before incubation in 2 mg/ml Pronase (SigmaAldrich) for 45 min at 37°C with agitation then 3 mg/ml Collagenase D (Roche) for 45 min at 37°C following extensive rinsing with PBS. After additional rinses with PBS to clear remaining soft tissue, cartilage elements were incubated again in 3 mg/ml Collagenase D for 3-6 hr until a single-cell suspension was achieved, with regular gentle titration with wide-bore 1 ml pipette tips. Cells were filtered then plated at 3000 cells per well of a black polystyrene wells flat bottom (with micro-clear bottom) 96-well plate (Greiner) in DMEM supplemented with 10% fetal calf serum and pen-strep. For the *nls-YAP5SAKI/+Col2a1cre-ERT+ve*

experiment, cells were treated 24 hr after plating with 1  $\mu$  M 4-hydroxytamoxifen in ethanol or ethanol only. Confluence was measured by automated detection of cell confluence in 3 hr serial photographs on an Essen IncuCyte. Apoptosis was assessed by the inclusion of apoptosis marker NucView488 (Biotium).

### **Skeletal preparations and high resolution episcopic microscopy**

Skeletal preparations were performed as previously described (Rigueur and Lyons, 2014). Samples were prepared for high resolution episcopic microscopy (HREM) by incubation in Bouin's fixation for a minimum of 3 days followed by extensive washing in PBS and dehydration, before incubation in JB-4/Dye mix for up to 4 weeks to ensure proper sample penetration and then embedded and imaged as previously described (Mohun and Weninger, 2012; Weninger et al., 2018) (<https://dmdd.org.uk/hrem/>). Meckel's cartilages were isolated from 3D reconstructed images using automated thresholded extraction in Analyze v12.0 visualisation and analysis software (AnalyzeDirect, Overland Park, KS, USA).

### **Histological analysis and *in situ* hybridisation**

Whole E17.5 pups were fixed in 10% neutral buffered formalin for two days then transferred to 70% ethanol. Rear limbs were dissected and processed by standard histological methods to generate 3  $\mu$ m paraffin sections, which were stained with haematoxylin and eosin (H&E) or immunostained with DAB detection for anti-Ki67 (1:350; AB16667, Abcam), anti-YAP or anti-TAZ (anti-WWTR1, 1:100 dilution; HPA007415, Atlas Antibodies) using standard protocols. The specificity of the YAP and TAZ antibodies was previously confirmed in knockout skin (Elbediwy et al., 2016). Growth plate zones were defined based on H&E morphology except for the prehypertrophic and hypertrophic zones, which were combined and considered as a single prehypertrophic/hypertrophic zone. For Ki67+ve cell counting, the proximal growth plate of the tibia was divided into the round proliferating, columnar proliferating and prehypertrophic/hypertrophic zones and a box of consistent size (for each zone) drawn within the centremost region of each defined zone. One tibial growth plate section was examined per biological replicate. Ki67 immuno-positive and -negative cells were counted manually and the number of Ki67 immuno-positive cells expressed as the percentage total. Cells in the prehypertrophic/hypertrophic

zone were negative for Ki67 staining. For cell counting per zone for Fig. 4E, the cells counted in the columnar proliferating zone were divided by an “area factor” representing the area of counted cells in the columnar proliferating zone divided by the area of counted cells in the round or pre-hypertrophic/hypertrophic zones, to account for the difference in area counted between the central zone compared to the other two zones. For DAPI-stained cell counts, see “EdU Proliferation” section below. For fluorescent immunostaining, paraffin sections (anti-SOX9, anti-COLXa1) were sectioned tibias were dewaxed then underwent a citrate buffer (pH 6.0) retrieval step. Fresh-frozen cryosections (anti-YAP) were fixed in 4% PFA for 10 min direct from storage then washed in PBS. All samples were next permeabilised for 10 min in PBS plus 0.1% Tween-20 then blocked for an hour with 5% normal goat’s serum in PBS plus 0.1% Triton X-100. Primary antibodies were diluted in 1% BSA in PBS at 1:250 for anti-SOX9 (AB5535, Sigma-Aldrich), 1:50 for anti-COLXa1 (14-9771-82, Invitrogen) and 1:100 for anti-YAP (14074, Cell Signaling Technology). Alexa Fluor 488 or 564 goat secondary antibodies against the appropriate species were diluted at 1:200 in 1% BSA in PBS and DAPI was used to stain nuclei. For RNA *in situ* hybridisation, RNAscope 2.5 HD Manual Assay (ACDBio) was performed according to manufacturer’s instructions, using RNAscope probes for *Ctgf* (314541, ACDBio) and *Cyr61* (429001, ACDBio).

### Micro CT

*Ex vivo* CT scans were acquired using a SkyScan 1176 CT scanner (Bruker MicroCT, Kontich, Belgium) with the source voltage set to 50 kV, the source current set to 500  $\mu$ A, a frame averaging of 5, and a 0.5 degree step size over a 360 degree trajectory. The scans were reconstructed using NRecon v1.7.3.0 software (Bruker MicroCT) with an 8.57  $\mu$ m isotropic voxel size and analysed using Analyze v12.0 visualisation and analysis software (AnalyzeDirect, Overland Park, KS, USA).

### Quantification of extracellular matrix quantification

Dewaxed slides were incubated in alcian blue solution (1% alcian blue in 3% acetic acid) for 5 mins before being washed extensively under running water and counterstained. To calculate percentage coverage by ECM, images were filtered in ImageJ with a Gaussian blur, then colours split and the red channel retained. Growth

plate regions were isolated from the centre of each chondrocyte zone and threshold using default settings. Percentage thresholded area was then measured.

### **EdU proliferation**

Pregnant dams were injected with 30 mg/kg EdU in PBS 2 hr prior to collection at E17.5. Pups were processed as described above for histological analysis. To assess proliferation, samples were processed for EdU staining with the Click-iT EdU Alexa Fluor 488 Imaging Kit (Invitrogen) according to a published protocol (Mead and Lefebvre, 2014). Images were acquired for nuclei (Hoechst) and EdU staining and a box of consistent size was drawn in the centremost region of each chondrocyte compartment. One tibial growth plate section was examined per biological replicate. EdU-positive and DAPI-stained nuclei were automatically counted using CellProfiler (McQuin et al., 2018).. DAPI staining was used to count cells along length of growth plate: an area of consistent width down the centre length of the growth plate was isolated. Images were processed in ImageJ by applying Gaussian blur filter followed by Huang thresholding and watershedding. The number and position of particles were detected, excluding particles with an area of less than 100 pixels, and the total number of particles or the longitudinal distance along the y-axis of the image was collected. Positional information was then binned in Prism 8.

### **Laser capture microdissection, RNA extraction and RTqPCR analysis**

E17.5 lower limbs were fresh frozen into Optimal Cutting Temperature reagent, sectioned at 10  $\mu\text{m}$  and 8-12 sections collected onto UV-treated PEN-Membrane 4,0  $\mu\text{m}$  slides (Leica). Directly before laser capture, slides were removed from storage at  $-80^{\circ}\text{C}$  and washed twice in ice cold 95% EtOH for 2 min. After airdrying the slides at room temperature, sections were visualised in brightfield on the Laser Capture Microdissector (LMD7000, Leica) and a 300  $\mu\text{m}$ -wide box drawn down the midline on the tibial growth plate. 7-12 growth plate regions per slide (i.e. per biological replicate) were dissected and collected into 0.5 ml tubes. 200  $\mu\text{l}$  of TRIzol Reagent (Invitrogen) was added to sections before storage at  $-20^{\circ}\text{C}$ . RNA was extracted using the Trizol manufacturer's instructions. cDNA was synthesised from isolated RNA using the Maxima cDNA Synthesis Kit (Thermo Fisher Scientific). RTqPCR was performed on the QuantStudio 7 Flex PCR System (Applied Biosystems) using



PowerUp SYBR Green Master Mix (Thermo Fisher Scientific). Primers are listed in Table S1.

## Statistical methods

Linear growth phase of primary chondrocytes was analysed by linear mixed models, including a fixed effect for elapsed time and a random effect for each technical repeat to account for random variance in experimental factors. The models were fitted in R using the function `lmer` of the R package `lme4` (Bates et al., 2015). The significance of the genotype was calculated by comparing the variance of the fitted models with and without the fixed genotype effect using an F-test with Satterthwaite's approximation for degrees of freedom (Kuznetsova et al., 2017). All remaining statistical analyses were performed in Prism 8.

## References

- Akiyama, H., Chaboissier, M.C., Martin, J.F., Schedl, A., and de Crombrughe, B. (2002). The transcription factor Sox9 has essential roles in successive steps of the chondrocyte differentiation pathway and is required for expression of Sox5 and Sox6. *Genes Dev* 16, 2813-2828.
- Akiyama, H., Lyons, J.P., Mori-Akiyama, Y., Yang, X., Zhang, R., Zhang, Z., Deng, J.M., Taketo, M.M., Nakamura, T., Behringer, R.R., *et al.* (2004). Interactions between Sox9 and beta-catenin control chondrocyte differentiation. *Genes Dev* 18, 1072-1087.
- Aoyama, E., Hattori, T., Hoshijima, M., Araki, D., Nishida, T., Kubota, S., and Takigawa, M. (2009). N-terminal domains of CCN family 2/connective tissue growth factor bind to aggrecan. *Biochem J* 420, 413-420.
- Bates, D., Machler, M., Bolker, B.M., and Walker, S.C. (2015). Fitting Linear Mixed-Effects Models Using `lme4`. *J Stat Softw* 67, 1-48.
- Cai, J., Maitra, A., Anders, R.A., Taketo, M.M., and Pan, D. (2015). beta-Catenin destruction complex-independent regulation of Hippo-YAP signaling by APC in intestinal tumorigenesis. *Genes Dev* 29, 1493-1506.
- Cai, J., Zhang, N., Zheng, Y., de Wilde, R.F., Maitra, A., and Pan, D. (2010). The Hippo signaling pathway restricts the oncogenic potential of an intestinal regeneration program. *Genes Dev* 24, 2383-2388.
- Chakraborty, S., Njah, K., Pobbati, A.V., Lim, Y.B., Raju, A., Lakshmanan, M., Tergaonkar, V., Lim, C.T., and Hong, W. (2017). Agrin as a Mechanotransduction Signal Regulating YAP through the Hippo Pathway. *Cell Rep* 18, 2464-2479.
- Chen, Q., Zhang, N., Gray, R.S., Li, H., Ewald, A.J., Zahnow, C.A., and Pan, D. (2014). A temporal requirement for Hippo signaling in mammary gland differentiation, growth, and tumorigenesis. *Genes Dev* 28, 432-437.



Cho, H., Kim, J., Ahn, J.H., Hong, Y.K., Makinen, T., Lim, D.S., and Koh, G.Y. (2019). YAP and TAZ Negatively Regulate Prox1 During Developmental and Pathologic Lymphangiogenesis. *Circ Res* 124, 225-242.

Cockburn, K., Biechele, S., Garner, J., and Rossant, J. (2013). The Hippo pathway member Nf2 is required for inner cell mass specification. *Curr Biol* 23, 1195-1201.

Cotton, J.L., Li, Q., Ma, L., Park, J.S., Wang, J., Ou, J., Zhu, L.J., Ip, Y.T., Johnson, R.L., and Mao, J. (2017). YAP/TAZ and Hedgehog Coordinate Growth and Patterning in Gastrointestinal Mesenchyme. *Dev Cell* 43, 35-47 e34.

Debaugnies, M., Sanchez-Danes, A., Rorive, S., Raphael, M., Liagre, M., Parent, M.A., Brisebarre, A., Salmon, I., and Blanpain, C. (2018). YAP and TAZ are essential for basal and squamous cell carcinoma initiation. *EMBO Rep* 19.

Deng, Y., Wu, A., Li, P., Li, G., Qin, L., Song, H., and Mak, K.K. (2016). Yap1 Regulates Multiple Steps of Chondrocyte Differentiation during Skeletal Development and Bone Repair. *Cell Rep* 14, 2224-2237.

Dong, J., Feldmann, G., Huang, J., Wu, S., Zhang, N., Comerford, S.A., Gayyed, M.F., Anders, R.A., Maitra, A., and Pan, D. (2007). Elucidation of a universal size-control mechanism in *Drosophila* and mammals. *Cell* 130, 1120-1133.

Elbediwy, A., Vanyai, H., Diaz-de-la-Loza, M.D., Frith, D., Snijders, A.P., and Thompson, B.J. (2018). Enigma proteins regulate YAP mechanotransduction. *J Cell Sci* 131.

Elbediwy, A., Vincent-Mistiaen, Z.I., Spencer-Dene, B., Stone, R.K., Boeing, S., Wculek, S.K., Cordero, J., Tan, E.H., Ridgway, R., Brunton, V.G., *et al.* (2016). Integrin signalling regulates YAP and TAZ to control skin homeostasis. *Development* 143, 1674-1687.

Feldkamp, M.L., Carey, J.C., Byrne, J.L.B., Krikov, S., and Botto, L.D. (2017). Etiology and clinical presentation of birth defects: population based study. *BMJ* 357, j2249.

Goto, H., Nishio, M., To, Y., Oishi, T., Miyachi, Y., Maehama, T., Nishina, H., Akiyama, H., Mak, T.W., Makii, Y., *et al.* (2018). Loss of Mob1a/b in mice results in chondrodysplasia due to YAP1/TAZ-TEAD-dependent repression of SOX9. *Development* 145.

Gregorieff, A., Liu, Y., Inanlou, M.R., Khomchuk, Y., and Wrana, J.L. (2015). Yap-dependent reprogramming of Lgr5(+) stem cells drives intestinal regeneration and cancer. *Nature* 526, 715-718.

Gruber, R., Panayiotou, R., Nye, E., Spencer-Dene, B., Stamp, G., and Behrens, A. (2016). YAP1 and TAZ Control Pancreatic Cancer Initiation in Mice by Direct Up-regulation of JAK-STAT3 Signaling. *Gastroenterology* 151, 526-539.

Hallett, S.A., Ono, W., and Ono, N. (2019). Growth Plate Chondrocytes: Skeletal Development, Growth and Beyond. *Int J Mol Sci* 20.

Harvey, K., and Tapon, N. (2007). The Salvador-Warts-Hippo pathway - an emerging tumour-suppressor network. *Nat Rev Cancer* 7, 182-191.

Heallen, T., Morikawa, Y., Leach, J., Tao, G., Willerson, J.T., Johnson, R.L., and Martin, J.F. (2013). Hippo signaling impedes adult heart regeneration. *Development* 140, 4683-4690.

Heallen, T., Zhang, M., Wang, J., Bonilla-Claudio, M., Klysik, E., Johnson, R.L., and Martin, J.F. (2011). Hippo pathway inhibits Wnt signaling to restrain cardiomyocyte proliferation and heart size. *Science* 332, 458-461.

Hou, W.S., Li, Z., Buttner, F.H., Bartnik, E., and Bromme, D. (2003). Cleavage site specificity of cathepsin K toward cartilage proteoglycans and protease complex formation. *Biol Chem* 384, 891-897.

Hu, J.K., Du, W., Shelton, S.J., Oldham, M.C., DiPersio, C.M., and Klein, O.D. (2017). An FAK-YAP-mTOR Signaling Axis Regulates Stem Cell-Based Tissue Renewal in Mice. *Cell Stem Cell* 21, 91-106 e106.

Ivkovic, S., Yoon, B.S., Popoff, S.N., Safadi, F.F., Libuda, D.E., Stephenson, R.C., Daluiski, A., and Lyons, K.M. (2003). Connective tissue growth factor coordinates chondrogenesis and angiogenesis during skeletal development. *Development* 130, 2779-2791.

Kafienah, W., Bromme, D., Buttle, D.J., Croucher, L.J., and Hollander, A.P. (1998). Human cathepsin K cleaves native type I and II collagens at the N-terminal end of the triple helix. *Biochem J* 331 ( Pt 3), 727-732.

Kaneko, K., Ito, M., Naoe, Y., Lacy-Hulbert, A., and Ikeda, K. (2014). Integrin  $\alpha$ v in the mechanical response of osteoblast lineage cells. *Biochem Biophys Res Commun* 447, 352-357.

Karystinou, A., Roelofs, A.J., Neve, A., Cantatore, F.P., Wackerhage, H., and De Bari, C. (2015). Yes-associated protein (YAP) is a negative regulator of chondrogenesis in mesenchymal stem cells. *Arthritis Res Ther* 17, 147.

Kegelman, C.D., Coulombe, J.C., Jordan, K.M., Horan, D.J., Qin, L., Robling, A.G., Ferguson, V.L., Bellido, T.M., and Boerckel, J.D. (2020). YAP and TAZ Mediate Osteocyte Perilacunar/Canalicular Remodeling. *J Bone Miner Res* 35, 196-210.

Kim, J., Kim, Y.H., Kim, J., Park, D.Y., Bae, H., Lee, D.H., Kim, K.H., Hong, S.P., Jang, S.P., Kubota, Y., *et al.* (2017). YAP/TAZ regulates sprouting angiogenesis and vascular barrier maturation. *J Clin Invest* 127, 3441-3461.

Kim, N.G., and Gumbiner, B.M. (2015). Adhesion to fibronectin regulates Hippo signaling via the FAK-Src-PI3K pathway. *J Cell Biol* 210, 503-515.

Kuznetsova, A., Brockhoff, P.B., and Christensen, R.H.B. (2017). lmerTest Package: Tests in Linear Mixed Effects Models. *J Stat Softw* 82, 1-26.

Lai, D., Ho, K.C., Hao, Y., and Yang, X. (2011). Taxol resistance in breast cancer cells is mediated by the hippo pathway component TAZ and its downstream transcriptional targets Cyr61 and CTGF. *Cancer Res* 71, 2728-2738.

Lange, A.W., Sridharan, A., Xu, Y., Stripp, B.R., Perl, A.K., and Whitsett, J.A. (2015). Hippo/Yap signaling controls epithelial progenitor cell proliferation and differentiation in the embryonic and adult lung. *J Mol Cell Biol* 7, 35-47.

Leach, J.P., Heallen, T., Zhang, M., Rahmani, M., Morikawa, Y., Hill, M.C., Segura, A., Willerson, J.T., and Martin, J.F. (2017). Hippo pathway deficiency reverses systolic heart failure after infarction. *Nature* 550, 260-264.

Lee, K.P., Lee, J.H., Kim, T.S., Kim, T.H., Park, H.D., Byun, J.S., Kim, M.C., Jeong, W.I., Calvisi, D.F., Kim, J.M., *et al.* (2010). The Hippo-Salvador pathway restrains hepatic oval cell proliferation, liver size, and liver tumorigenesis. *Proc Natl Acad Sci U S A* 107, 8248-8253.

Li, H., Li, X., Jing, X., Li, M., Ren, Y., Chen, J., Yang, C., Wu, H., and Guo, F. (2018). Hypoxia promotes maintenance of the chondrogenic phenotype in rat growth plate chondrocytes through the HIF-1 $\alpha$ /YAP signaling pathway. *Int J Mol Med* 42, 3181-3192.

Li, J., Luo, H., Wang, R., Lang, J., Zhu, S., Zhang, Z., Fang, J., Qu, K., Lin, Y., Long, H., *et al.* (2016a). Systematic Reconstruction of Molecular Cascades Regulating GP Development Using Single-Cell RNA-Seq. *Cell Rep* 15, 1467-1480.

Li, P., Silvis, M.R., Honaker, Y., Lien, W.H., Arron, S.T., and Vasioukhin, V. (2016b).  $\alpha$ E-catenin inhibits a Src-YAP1 oncogenic module that couples tyrosine kinases and the effector of Hippo signaling pathway. *Genes Dev* 30, 798-811.

Lin, C., Yao, E., Zhang, K., Jiang, X., Croll, S., Thompson-Peer, K., and Chuang, P.T. (2017). YAP is essential for mechanical force production and epithelial cell proliferation during lung branching morphogenesis. *Elife* 6.

Lin, Z., Guo, H., Cao, Y., Zohrabian, S., Zhou, P., Ma, Q., VanDusen, N., Guo, Y., Zhang, J., Stevens, S.M., *et al.* (2016). Acetylation of VGLL4 Regulates Hippo-YAP Signaling and Postnatal Cardiac Growth. *Dev Cell* 39, 466-479.

Lu, L., Finegold, M.J., and Johnson, R.L. (2018). Hippo pathway coactivators Yap and Taz are required to coordinate mammalian liver regeneration. *Exp Mol Med* 50, e423.

Lu, L., Li, Y., Kim, S.M., Bossuyt, W., Liu, P., Qiu, Q., Wang, Y., Halder, G., Finegold, M.J., Lee, J.S., *et al.* (2010). Hippo signaling is a potent in vivo growth and tumor suppressor pathway in the mammalian liver. *Proc Natl Acad Sci U S A* 107, 1437-1442.

Mahoney, J.E., Mori, M., Szymaniak, A.D., Varelas, X., and Cardoso, W.V. (2014). The hippo pathway effector Yap controls patterning and differentiation of airway epithelial progenitors. *Dev Cell* 30, 137-150.

Mamidi, A., Prawiro, C., Seymour, P.A., de Lichtenberg, K.H., Jackson, A., Serup, P., and Semb, H. (2018). Mechanosignalling via integrins directs fate decisions of pancreatic progenitors. *Nature* 564, 114-118.

Manderfield, L.J., Aghajanian, H., Engleka, K.A., Lim, L.Y., Liu, F., Jain, R., Li, L., Olson, E.N., and Epstein, J.A. (2015). Hippo signaling is required for Notch-dependent smooth muscle differentiation of neural crest. *Development* 142, 2962-2971.

McQuin, C., Goodman, A., Chernyshev, V., Kametsky, L., Cimini, B.A., Karhohs, K.W., Doan, M., Ding, L., Rafelski, S.M., Thirstrup, D., *et al.* (2018). CellProfiler 3.0: Next-generation image processing for biology. *PLoS Biol* 16, e2005970.

Mead, T.J., and Lefebvre, V. (2014). Proliferation assays (BrdU and EdU) on skeletal tissue sections. *Methods Mol Biol* 1130, 233-243.

Mirando, A.J. (2014). Isolation and Culture of Murine Primary Chondrocytes. In *Skeletal Development and Repair*, M.J. Hilton, ed. (Springer), pp. 267-277.

Mohun, T.J., and Weninger, W.J. (2012). Embedding embryos for high-resolution episcopic microscopy (HREM). *Cold Spring Harb Protoc* 2012, 678-680.

Monroe, T.O., Hill, M.C., Morikawa, Y., Leach, J.P., Heallen, T., Cao, S., Krijger, P.H.L., de Laat, W., Wehrens, X.H.T., Rodney, G.G., *et al.* (2019). YAP Partially Reprograms Chromatin Accessibility to Directly Induce Adult Cardiogenesis In Vivo. *Dev Cell* 48, 765-779 e767.

Moya, I.M., and Halder, G. (2019). Hippo-YAP/TAZ signalling in organ regeneration and regenerative medicine. *Nat Rev Mol Cell Biol* 20, 211-226.

Nakamura, E., Nguyen, M.T., and Mackem, S. (2006). Kinetics of tamoxifen-regulated Cre activity in mice using a cartilage-specific CreER(T) to assay temporal activity windows along the proximodistal limb skeleton. *Dev Dyn* 235, 2603-2612.

Nardone, G., Oliver-De La Cruz, J., Vrbsky, J., Martini, C., Pribyl, J., Skladal, P., Pesl, M., Caluori, G., Pagliari, S., Martino, F., *et al.* (2017). YAP regulates cell mechanics by controlling focal adhesion assembly. *Nat Commun* 8, 15321.

Neto, F., Klaus-Bergmann, A., Ong, Y.T., Alt, S., Vion, A.C., Szymborska, A., Carvalho, J.R., Hollfinger, I., Bartels-Klein, E., Franco, C.A., *et al.* (2018). YAP and TAZ regulate adherens junction dynamics and endothelial cell distribution during vascular development. *Elife* 7.

Nishida, T., Kawaki, H., Baxter, R.M., Deyoung, R.A., Takigawa, M., and Lyons, K.M. (2007). CCN2 (Connective Tissue Growth Factor) is essential for extracellular matrix production and integrin signaling in chondrocytes. *J Cell Commun Signal* 1, 45-58.

Nishioka, N., Inoue, K., Adachi, K., Kiyonari, H., Ota, M., Ralston, A., Yabuta, N., Hirahara, S., Stephenson, R.O., Ogonuki, N., *et al.* (2009). The Hippo signaling pathway components Lats and Yap pattern Tead4 activity to distinguish mouse trophectoderm from inner cell mass. *Dev Cell* 16, 398-410.

Nukuda, A., Sasaki, C., Ishihara, S., Mizutani, T., Nakamura, K., Ayabe, T., Kawabata, K., and Haga, H. (2015). Stiff substrates increase YAP-signaling-mediated matrix metalloproteinase-7 expression. *Oncogenesis* 4, e165.

O'Brien, T.P., and Lau, L.F. (1992). Expression of the growth factor-inducible immediate early gene *cyr61* correlates with chondrogenesis during mouse embryonic development. *Cell Growth Differ* 3, 645-654.

Ovchinnikov, D.A., Deng, J.M., Ogunrinu, G., and Behringer, R.R. (2000). Col2a1-directed expression of Cre recombinase in differentiating chondrocytes in transgenic mice. *Genesis* 26, 145-146.

Pan, D. (2007). Hippo signaling in organ size control. *Genes Dev* 21, 886-897.

Reginensi, A., Enderle, L., Gregorieff, A., Johnson, R.L., Wrana, J.L., and McNeill, H. (2016). A critical role for NF2 and the Hippo pathway in branching morphogenesis. *Nat Commun* 7, 12309.

Reginensi, A., Hoshi, M., Boualia, S.K., Bouchard, M., Jain, S., and McNeill, H. (2015). Yap and Taz are required for Ret-dependent urinary tract morphogenesis. *Development* 142, 2696-2703.

Reginensi, A., Scott, R.P., Gregorieff, A., Bagherie-Lachidan, M., Chung, C., Lim, D.S., Pawson, T., Wrana, J., and McNeill, H. (2013). Yap- and Cdc42-dependent nephrogenesis and morphogenesis during mouse kidney development. *PLoS Genet* 9, e1003380.

Ricks, J.E., Ryder, V.M., Bridgewater, L.C., Schaalje, B., and Seegmiller, R.E. (2002). Altered mandibular development precedes the time of palate closure in mice homozygous for disproportionate micromelia: an oral clefting model supporting the Pierre-Robin sequence. *Teratology* 65, 116-120.

Rigueur, D., and Lyons, K.M. (2014). Whole-mount skeletal staining. *Methods Mol Biol* 1130, 113-121.

Rosado-Olivieri, E.A., Anderson, K., Kenty, J.H., and Melton, D.A. (2019). YAP inhibition enhances the differentiation of functional stem cell-derived insulin-producing beta cells. *Nat Commun* 10, 1464.

Sabra, H., Brunner, M., Mandati, V., Wehrle-Haller, B., Lallemand, D., Ribba, A.S., Chevalier, G., Guardiola, P., Block, M.R., and Bouvard, D. (2017). beta1 integrin-dependent Rac/group I PAK signaling mediates YAP activation of Yes-associated protein 1 (YAP1) via NF2/merlin. *J Biol Chem* 292, 19179-19197.

Schlegelmilch, K., Mohseni, M., Kirak, O., Pruszek, J., Rodriguez, J.R., Zhou, D., Kreger, B.T., Vasioukhin, V., Avruch, J., Brummelkamp, T.R., *et al.* (2011). Yap1 acts downstream of alpha-catenin to control epidermal proliferation. *Cell* 144, 782-795.

Shea, C.A., Rolfe, R.A., McNeill, H., and Murphy, P. (2020). Localization of YAP activity in developing skeletal rudiments is responsive to mechanical stimulation. *Dev Dyn* 249, 523-542.

Shi, J., Son, M.Y., Yamada, S., Szabova, L., Kahan, S., Chrysovergis, K., Wolf, L., Surmak, A., and Holmbeck, K. (2008). Membrane-type MMPs enable extracellular matrix permissiveness and mesenchymal cell proliferation during embryogenesis. *Dev Biol* 313, 196-209.

Si, Y., Ji, X., Cao, X., Dai, X., Xu, L., Zhao, H., Guo, X., Yan, H., Zhang, H., Zhu, C., *et al.* (2017). Src Inhibits the Hippo Tumor Suppressor Pathway through Tyrosine Phosphorylation of Lats1. *Cancer Res* 77, 4868-4880.

Stanton, A.E., Tong, X., Lee, S., and Yang, F. (2019). Biochemical Ligand Density Regulates Yes-Associated Protein Translocation in Stem Cells through Cytoskeletal Tension and Integrins. *ACS Appl Mater Interfaces* 11, 8849-8857.

Stickens, D., Behonick, D.J., Ortega, N., Heyer, B., Hartenstein, B., Yu, Y., Fosang, A.J., Schorpp-Kistner, M., Angel, P., and Werb, Z. (2004). Altered endochondral bone development in matrix metalloproteinase 13-deficient mice. *Development* 131, 5883-5895.

Swarr, D.T., and Reid Sutton, V. (2010). Skeletal Dysplasias in the Newborn: Diagnostic Evaluation and Developmental Genetics. *NeoReviews* 11, e290-e305.

Szymaniak, A.D., Mahoney, J.E., Cardoso, W.V., and Varelas, X. (2015). Crumbs3-Mediated Polarity Directs Airway Epithelial Cell Fate through the Hippo Pathway Effector Yap. *Dev Cell* 34, 283-296.

Tang, Y., Rowe, R.G., Botvinick, E.L., Kurup, A., Putnam, A.J., Seiki, M., Weaver, V.M., Keller, E.T., Goldstein, S., Dai, J., *et al.* (2013). MT1-MMP-dependent control of skeletal stem cell commitment via a beta1-integrin/YAP/TAZ signaling axis. *Dev Cell* 25, 402-416.

Tomita, N., Hattori, T., Itoh, S., Aoyama, E., Yao, M., Yamashiro, T., and Takigawa, M. (2013). Cartilage-specific over-expression of CCN family member 2/connective tissue growth factor (CCN2/CTGF) stimulates insulin-like growth factor expression and bone growth. *PLoS One* 8, e59226.

Vincent-Mistiaen, Z., Elbediwy, A., Vanyai, H., Cotton, J., Stamp, G., Nye, E., Spencer-Dene, B., Thomas, G.J., Mao, J., and Thompson, B. (2018). YAP drives cutaneous squamous cell carcinoma formation and progression. *Elife* 7.

Vu, T.H., Shipley, J.M., Bergers, G., Berger, J.E., Helms, J.A., Hanahan, D., Shapiro, S.D., Senior, R.M., and Werb, Z. (1998). MMP-9/gelatinase B is a key regulator of growth plate angiogenesis and apoptosis of hypertrophic chondrocytes. *Cell* 93, 411-422.

Wang, J., Xiao, Y., Hsu, C.W., Martinez-Traverso, I.M., Zhang, M., Bai, Y., Ishii, M., Maxson, R.E., Olson, E.N., Dickinson, M.E., *et al.* (2016a). Yap and Taz play a crucial role in neural crest-derived craniofacial development. *Development* 143, 504-515.

Wang, L., Luo, J.Y., Li, B., Tian, X.Y., Chen, L.J., Huang, Y., Liu, J., Deng, D., Lau, C.W., Wan, S., *et al.* (2016b). Integrin-YAP/TAZ-JNK cascade mediates atheroprotective effect of unidirectional shear flow. *Nature* 540, 579-582.

Wang, X., Freire Valls, A., Schermann, G., Shen, Y., Moya, I.M., Castro, L., Urban, S., Solecki, G.M., Winkler, F., Riedemann, L., *et al.* (2017). YAP/TAZ Orchestrate VEGF Signaling during Developmental Angiogenesis. *Dev Cell* 42, 462-478 e467.

Weninger, W.J., Maurer-Gesek, B., Reissig, L.F., Prin, F., Wilson, R., Galli, A., Adams, D.J., White, J.K., Mohun, T.J., and Geyer, S.H. (2018). Visualising the Cardiovascular System of Embryos of Biomedical Model Organisms with High Resolution Episcopic Microscopy (HREM). *J Cardiovasc Dev Dis* 5.

Williamson, K.A., Rainger, J., Floyd, J.A., Ansari, M., Meynert, A., Aldridge, K.V., Rainger, J.K., Anderson, C.A., Moore, A.T., Hurles, M.E., *et al.* (2014). Heterozygous loss-of-function mutations in YAP1 cause both isolated and syndromic optic fissure closure defects. *Am J Hum Genet* 94, 295-302.

Wong, K.F., Liu, A.M., Hong, W., Xu, Z., and Luk, J.M. (2016). Integrin alpha2beta1 inhibits MST1 kinase phosphorylation and activates Yes-associated protein oncogenic signaling in hepatocellular carcinoma. *Oncotarget* 7, 77683-77695.



Wong, M., Kireeva, M.L., Kolesnikova, T.V., and Lau, L.F. (1997). Cyr61, product of a growth factor-inducible immediate-early gene, regulates chondrogenesis in mouse limb bud mesenchymal cells. *Dev Biol* **192**, 492-508.

Xin, M., Kim, Y., Sutherland, L.B., Murakami, M., Qi, X., McAnally, J., Porrello, E.R., Mahmoud, A.I., Tan, W., Shelton, J.M., *et al.* (2013). Hippo pathway effector Yap promotes cardiac regeneration. *Proc Natl Acad Sci U S A* **110**, 13839-13844.

Yang, B., Sun, H., Song, F., Yu, M., Wu, Y., and Wang, J. (2017). YAP1 negatively regulates chondrocyte differentiation partly by activating the beta-catenin signaling pathway. *Int J Biochem Cell Biol* **87**, 104-113.

Yang, K., Wu, Y., Cheng, P., Zhang, J., Yang, C., Pi, B., Ye, Y., You, H., Chen, A., Xu, T., *et al.* (2016). YAP and ERK mediated mechanical strain-induced cell cycle progression through RhoA and cytoskeletal dynamics in rat growth plate chondrocytes. *J Orthop Res* **34**, 1121-1129.

Yang, L., Tsang, K.Y., Tang, H.C., Chan, D., and Cheah, K.S. (2014). Hypertrophic chondrocytes can become osteoblasts and osteocytes in endochondral bone formation. *Proc Natl Acad Sci U S A* **111**, 12097-12102.

Yi, J., Lu, L., Yanger, K., Wang, W., Sohn, B.H., Stanger, B.Z., Zhang, M., Martin, J.F., Ajani, J.A., Chen, J., *et al.* (2016). Large tumor suppressor homologs 1 and 2 regulate mouse liver progenitor cell proliferation and maturation through antagonism of the coactivators YAP and TAZ. *Hepatology* **64**, 1757-1772.

Yu, F.X., Zhao, B., and Guan, K.L. (2015). Hippo Pathway in Organ Size Control, Tissue Homeostasis, and Cancer. *Cell* **163**, 811-828.

Zender, L., Spector, M.S., Xue, W., Flemming, P., Cordon-Cardo, C., Silke, J., Fan, S.T., Luk, J.M., Wigler, M., Hannon, G.J., *et al.* (2006). Identification and validation of oncogenes in liver cancer using an integrative oncogenomic approach. *Cell* **125**, 1253-1267.

Zhang, H., Liu, C.Y., Zha, Z.Y., Zhao, B., Yao, J., Zhao, S., Xiong, Y., Lei, Q.Y., and Guan, K.L. (2009). TEAD transcription factors mediate the function of TAZ in cell growth and epithelial-mesenchymal transition. *J Biol Chem* **284**, 13355-13362.

Zhang, H., Pasolli, H.A., and Fuchs, E. (2011). Yes-associated protein (YAP) transcriptional coactivator functions in balancing growth and differentiation in skin. *Proc Natl Acad Sci U S A* **108**, 2270-2275.

Zhang, N., Bai, H., David, K.K., Dong, J., Zheng, Y., Cai, J., Giovannini, M., Liu, P., Anders, R.A., and Pan, D. (2010). The Merlin/NF2 tumor suppressor functions through the YAP oncoprotein to regulate tissue homeostasis in mammals. *Dev Cell* **19**, 27-38.

Zhang, Y., Sheu, T.J., Hoak, D., Shen, J., Hilton, M.J., Zuscik, M.J., Jonason, J.H., and O'Keefe, R.J. (2016). CCN1 Regulates Chondrocyte Maturation and Cartilage Development. *J Bone Miner Res* **31**, 549-559.

Zhao, B., Ye, X., Yu, J., Li, L., Li, W., Li, S., Yu, J., Lin, J.D., Wang, C.Y., Chinnaiyan, A.M., *et al.* (2008). TEAD mediates YAP-dependent gene induction and growth control. *Genes Dev* **22**, 1962-1971.

Zheng, Y., and Pan, D. (2019). The Hippo Signaling Pathway in Development and Disease. *Dev Cell* 50, 264-282.

Zhong, W., Li, Y., Li, L., Zhang, W., Wang, S., and Zheng, X. (2013). YAP-mediated regulation of the chondrogenic phenotype in response to matrix elasticity. *J Mol Histol* 44, 587-595.

Zhou, D., Zhang, Y., Wu, H., Barry, E., Yin, Y., Lawrence, E., Dawson, D., Willis, J.E., Markowitz, S.D., Camargo, F.D., *et al.* (2011). Mst1 and Mst2 protein kinases restrain intestinal stem cell proliferation and colonic tumorigenesis by inhibition of Yes-associated protein (Yap) overabundance. *Proc Natl Acad Sci U S A* 108, E1312-1320.

Zhou, X., von der Mark, K., Henry, S., Norton, W., Adams, H., and de Crombrughe, B. (2014). Chondrocytes transdifferentiate into osteoblasts in endochondral bone during development, postnatal growth and fracture healing in mice. *PLoS Genet* 10, e1004820.



## Figures

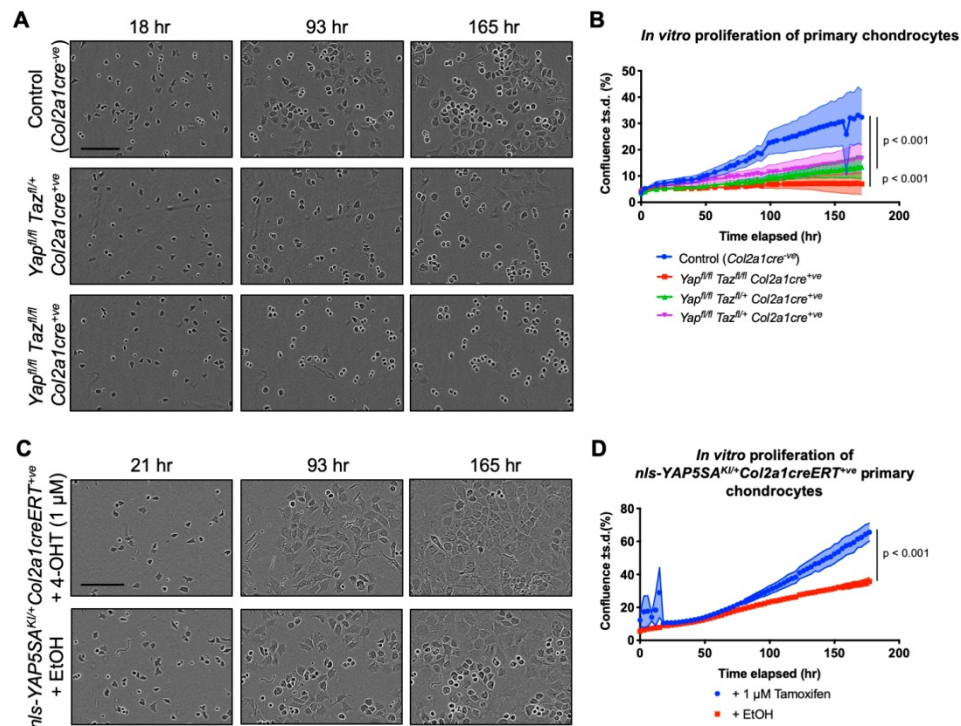

**Figure 1. YAP and TAZ are required for primary chondrocyte proliferation *in vitro*.**

A) Primary chondrocyte cultures from ribcages and sterna of control (*Col2a1cre<sup>-ve</sup>*), *Yap<sup>fl/fl</sup>Taz<sup>fl/fl</sup>Col2a1cre<sup>+ve</sup>* or *Yap<sup>fl/fl</sup>Taz<sup>fl/fl</sup>Col2a1cre<sup>+ve</sup>* E17.5 pups plated at low density (3000 cells per well).

B) Proliferation, measured by confluence (percentage cell coverage) of field of view, of cultures from A). Data represent 6 technical replicates of primary chondrocytes derived from individual pups (biological replicates) of the indicated genotype and are representative of 4 independent experiments. Total biological replicates analysed were  $n = 7$  control (*Col2a1cre<sup>-ve</sup>*), 4 *Yap<sup>fl/fl</sup>Taz<sup>fl/fl</sup>Col2a1cre<sup>+ve</sup>* and 4 *Yap<sup>fl/fl</sup>Taz<sup>fl/fl</sup>Col2a1cre<sup>+ve</sup>* E17.5 pups. Linear growth phase was measured by linear mixed model.

C) Primary chondrocyte cultures from ribcages and sterna of *nls-YAP5SA<sup>KI/+</sup>Col2a1creERT<sup>+ve</sup>* E17.5 pups treated with 1  $\mu$ M 4-hydroxytamoxifen (4-OHT) or ethanol vehicle (EtOH) at 24 hr after plating.

D) Proliferation, measured by percentage cell confluence of field of view, of cultures from C). Data represent average of biological replicates, the averages of which were derived from 6 technical replicates, treated with or without Tamoxifen.  $n = 3$  *nls-YAP5SA<sup>Kl/+</sup>Col2a1creERT<sup>+ve</sup>* E17.5 pups. Linear growth phase was measured by linear mixed model.

Scale bar = 150  $\mu\text{m}$  (A,C).

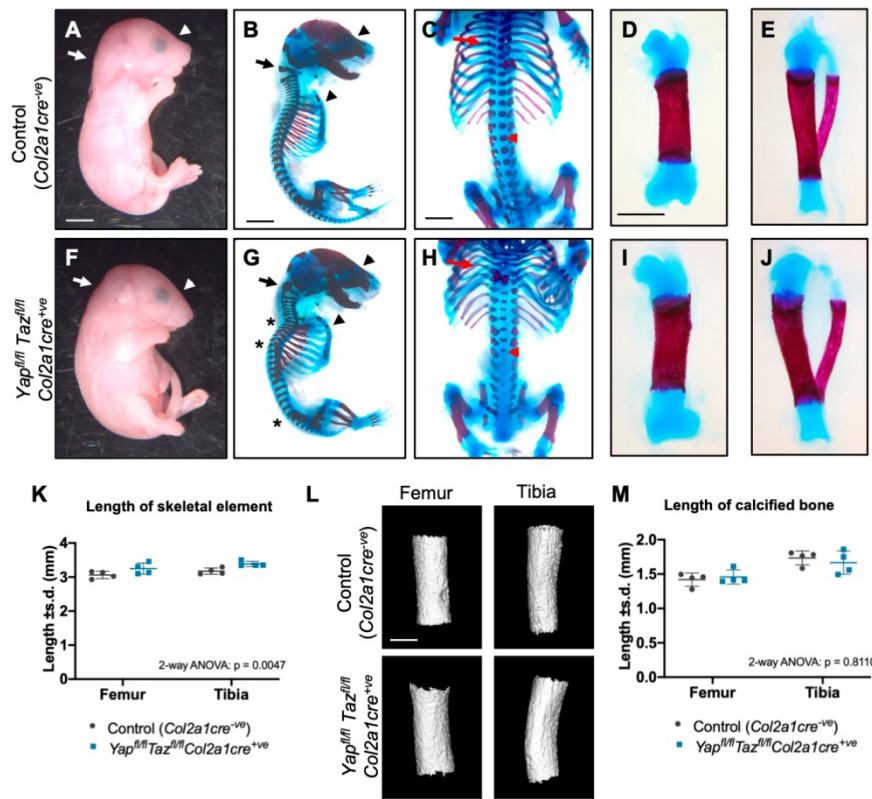

**Figure 2. Chondrodysplasia in *Yap/Taz* chondrocyte-specific knockout pups.**

Gross morphology and skeletal preparations of E17.5 control (*Col2a1cre<sup>-ve</sup>*) (A-E) and *Yap<sup>fl/fl</sup>Taz<sup>fl/fl</sup>Col2a1cre<sup>+ve</sup>* (F-J) pups.

A,F) Lateral view of E17.5 control (*Col2a1cre<sup>-ve</sup>*) and *Yap<sup>fl/fl</sup>Taz<sup>fl/fl</sup>Col2a1cre<sup>+ve</sup>* pups. White arrow indicates hunch in neck and white arrowhead indicates flattened morphology of the snout.

B,G) Lateral view of skeletal preparations of E17.5 control (*Col2a1cre<sup>-ve</sup>*) and *Yap<sup>fl/fl</sup>Taz<sup>fl/fl</sup>Col2a1cre<sup>+ve</sup>* pups with forelimbs removed. Black arrow indicates abnormal morphology of the c1 (atlas) vertebra and black arrowheads indicate the flattened rostrum of the skull and the barrel-like ribcage and curved sternum in the *Yap<sup>fl/fl</sup>Taz<sup>fl/fl</sup>Col2a1cre<sup>+ve</sup>* mutant compared to control. Asterix in G) indicate specific bend regions in the spine that are not present in the spine of the control.

C,H) Ventral view of skeletal preparations of E17.5 control (*Col2a1cre<sup>-ve</sup>*) and *Yap<sup>fl/fl</sup>Taz<sup>fl/fl</sup>Col2a1cre<sup>+ve</sup>* pups. Red arrows indicate the ossified (red-stained) portion of the ribs adjacent to the vertebrae emerging towards the anterior before redirecting toward the posterior in the *Yap<sup>fl/fl</sup>Taz<sup>fl/fl</sup>Col2a1cre<sup>+ve</sup>* mutant compared to the lateral emergence of the ossified rib in the control. The red arrow head indicates delayed or

absent ossification in the vertebrae of the  $Yap^{fl/fl}Taz^{fl/fl}Col2a1cre^{+ve}$  mutant compared to control.

D,E,I,J) Isolated femur (D,I) and tibia and fibula (G,J) from skeletal preparations of E17.5 control ( $Col2a1cre^{-ve}$ ) and  $Yap^{fl/fl}Taz^{fl/fl}Col2a1cre^{+ve}$  pups. Note the curvature of the tibia in (J) compared to (E).

K) Measurements of femurs and tibias from skeletal preparations of  $n = 4$  control ( $Col2a1cre^{-ve}$ ) and 4  $Yap^{fl/fl}Taz^{fl/fl}Col2a1cre^{+ve}$  pups. Data were analysed by 2-way ANOVA, with skeletal element and genotype as the independent variables, length as dependent variable. The effect of genotype on length was significant ( $p = 0.0047$ ).

L) Micro computed tomography ( $\mu$ CT) volume rendered bone portions of E17.5 femurs and tibias.

M) Measurements of femurs and tibias from  $\mu$ CT analysis of  $n = 4$  control ( $Col2a1cre^{-ve}$ ) and 4  $Yap^{fl/fl}Taz^{fl/fl}Col2a1cre^{+ve}$  E17.5 pups. Data were analysed by 2-way ANOVA, with skeletal element and genotype as the independent variables, length as dependent variable. The effect of genotype on length was not significant ( $p = 0.8110$ ).

Scale bar = 3 mm (A,B,F,G), 2 mm (C,H), 1 mm (D,E,I,J), 600  $\mu$ m (L).

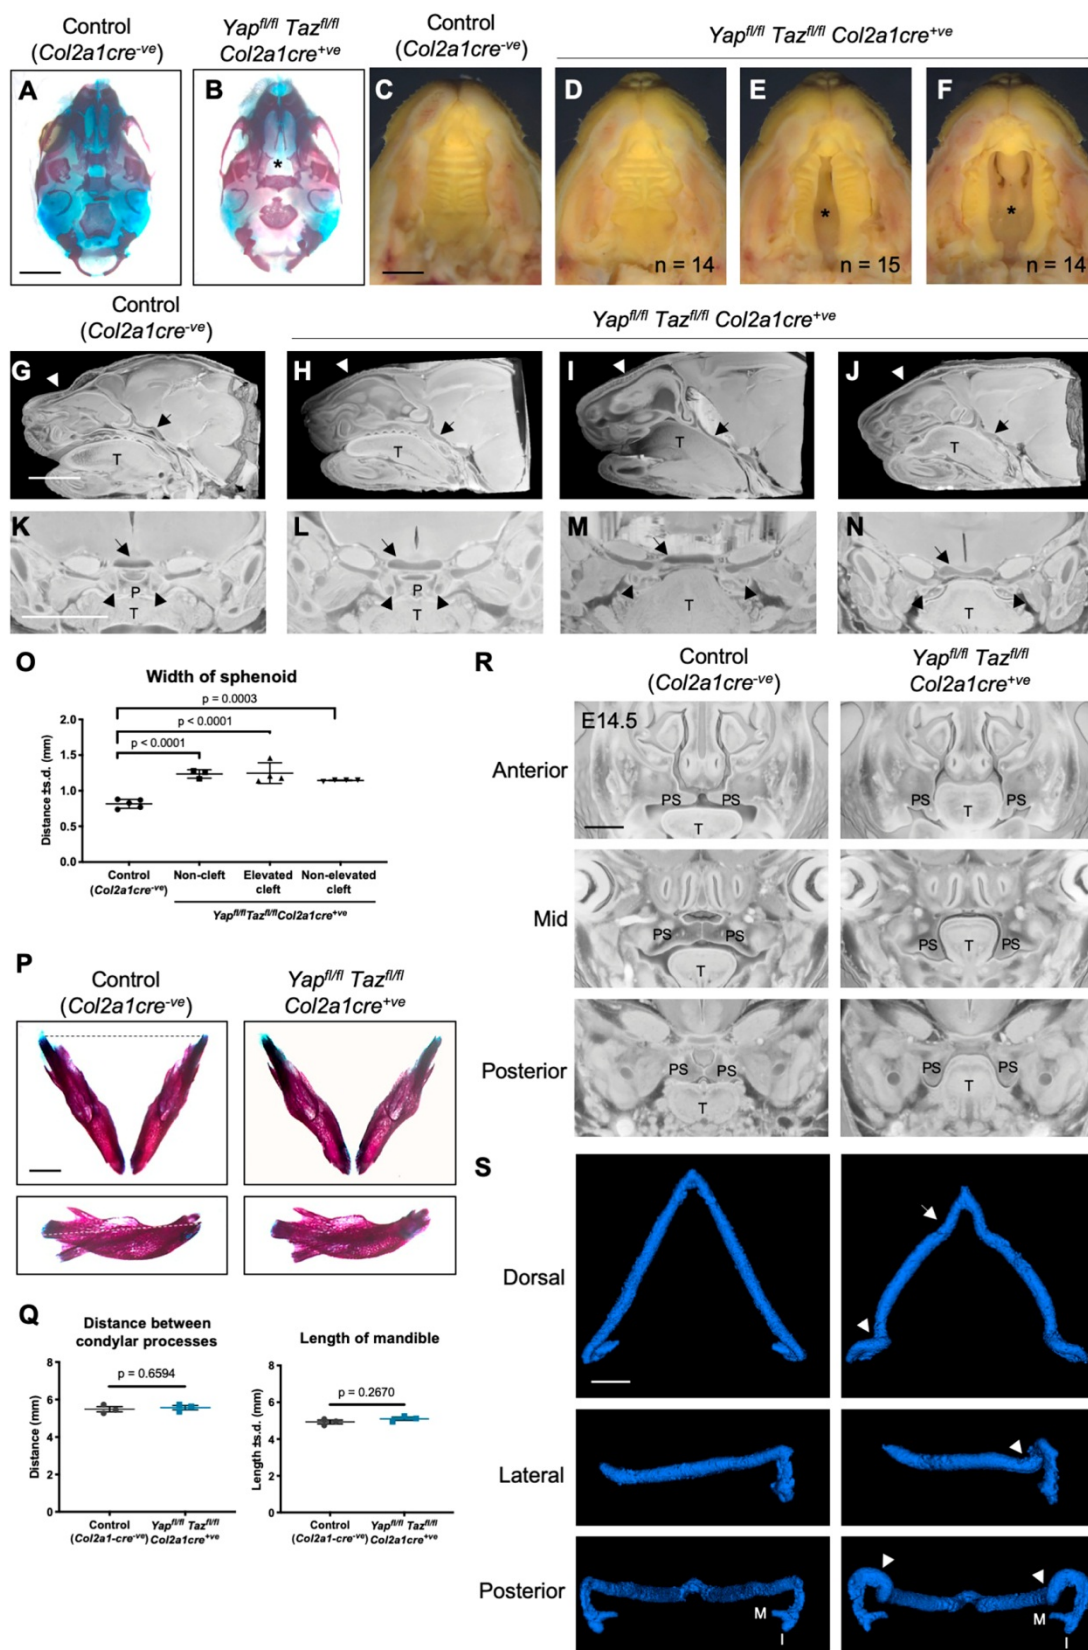

**Figure 3. Cleft palate in *Yap/Taz* chondrocyte-specific knockout pups.**

A,B) Skeletal preparations of E17.5 control (*Col2a1cre*<sup>-ve</sup>) and

*Yap*<sup>fl/fl</sup>*Taz*<sup>fl/fl</sup>*Col2a1cre*<sup>+ve</sup> pups. \* indicates cleft palate.

C-F) Gross morphology of the ventral surface of the palate, with lower jaw removed, showing control palate (C) and *Yap*<sup>fl/fl</sup>*Taz*<sup>fl/fl</sup>*Col2a1cre*<sup>+ve</sup> mutant palate (D-F),

including a uncleft palate (D) or a narrow, elevated (E) or wide, unelevated (F) cleft palate. \* indicates cleft palate, n = number of mutants *Yap*<sup>fl/fl</sup>*Taz*<sup>fl/fl</sup>*Col2a1cre*<sup>+ve</sup> E17.5 with each type of palate phenotype.

G-J) Lateral cut-away of high resolution episcopic microscopy (HREM) 3-dimensional renderings of control (*Col2a1cre*<sup>-ve</sup>) (H) and *Yap*<sup>fl/fl</sup>*Taz*<sup>fl/fl</sup>*Col2a1cre*<sup>+ve</sup> E17.5 pups to reveal normal morphology of the cranial base (black arrow) with the tongue (T) sitting below the intact palate (black arrowhead) in the control (G) compared to the abnormally angled cranial base (black arrow, H-J) and the tongue adjacent to the cranial base in the mutants with cleft palate (I,J).

K-N) Frontal cut-away view of the palate at the level of the pterygoid process. Note the widened sphenoid cartilage (black arrow) in all mutants (L-N) and laterally rotated pterygoid processes (black arrowheads) in the cleft palate mutants (M,N). P, palate; T, tongue.

O) Quantification of width of sphenoid. Data were analysed by 1-way ANOVA followed by multiple comparisons, p values as indicated. HREM data derived from n = 5 control, 3 non-cleft mutant, 4 elevated and 4 non-elevated cleft palate mutants.

P) Isolated mandibles from skeletal preparations of E17.5 control (*Col2a1cre*<sup>-ve</sup>) and *Yap*<sup>fl/fl</sup>*Taz*<sup>fl/fl</sup>*Col2a1cre*<sup>+ve</sup> pups. Upper, dorsal view; lower, lateral view.

Q) Measurements of distance between condylar processes (dotted line in upper panel of P)) and length of mandible (dotted line in lower panel of P)). Data were analysed by unpaired t-test and were not significant (p = 0.6594 (left); p = 0.2670 (right)). N = 3 per genotype.

R) Frontal cut-away of high resolution episcopic microscopy (HREM) 3-dimensional renderings of control (*Col2a1cre*<sup>-ve</sup>) and *Yap*<sup>fl/fl</sup>*Taz*<sup>fl/fl</sup>*Col2a1cre*<sup>+ve</sup> fetuses at E14.5 along the anterior-posterior length of the palate. The palatal shelves (PS) of 5 of 6 controls were elevated and partially or completely fused. All palatal shelves of 5 mutants remained unelevated alongside the tongue (T).



S) Threshold-isolated Meckel's cartilage from HREM 3-dimensional renderings, representative of n = 4 control (*Col2a1cre*<sup>-ve</sup>) and n = 4 *Yap*<sup>fl/fl</sup>*Taz*<sup>fl/fl</sup>*Col2a1cre*<sup>+ve</sup> samples. Meckel's cartilage in the mutants (right panels) was shorter with abnormal morphology (white arrow), including an additional partial rotation at the posterior (arrowhead) prior to the malleus (M) and incus (I). Scale bar = 2 mm (A,B), 1.4 mm (C-F), 1.8 mm (G-N), 1 mm (P), 0.5 mm (R,S).



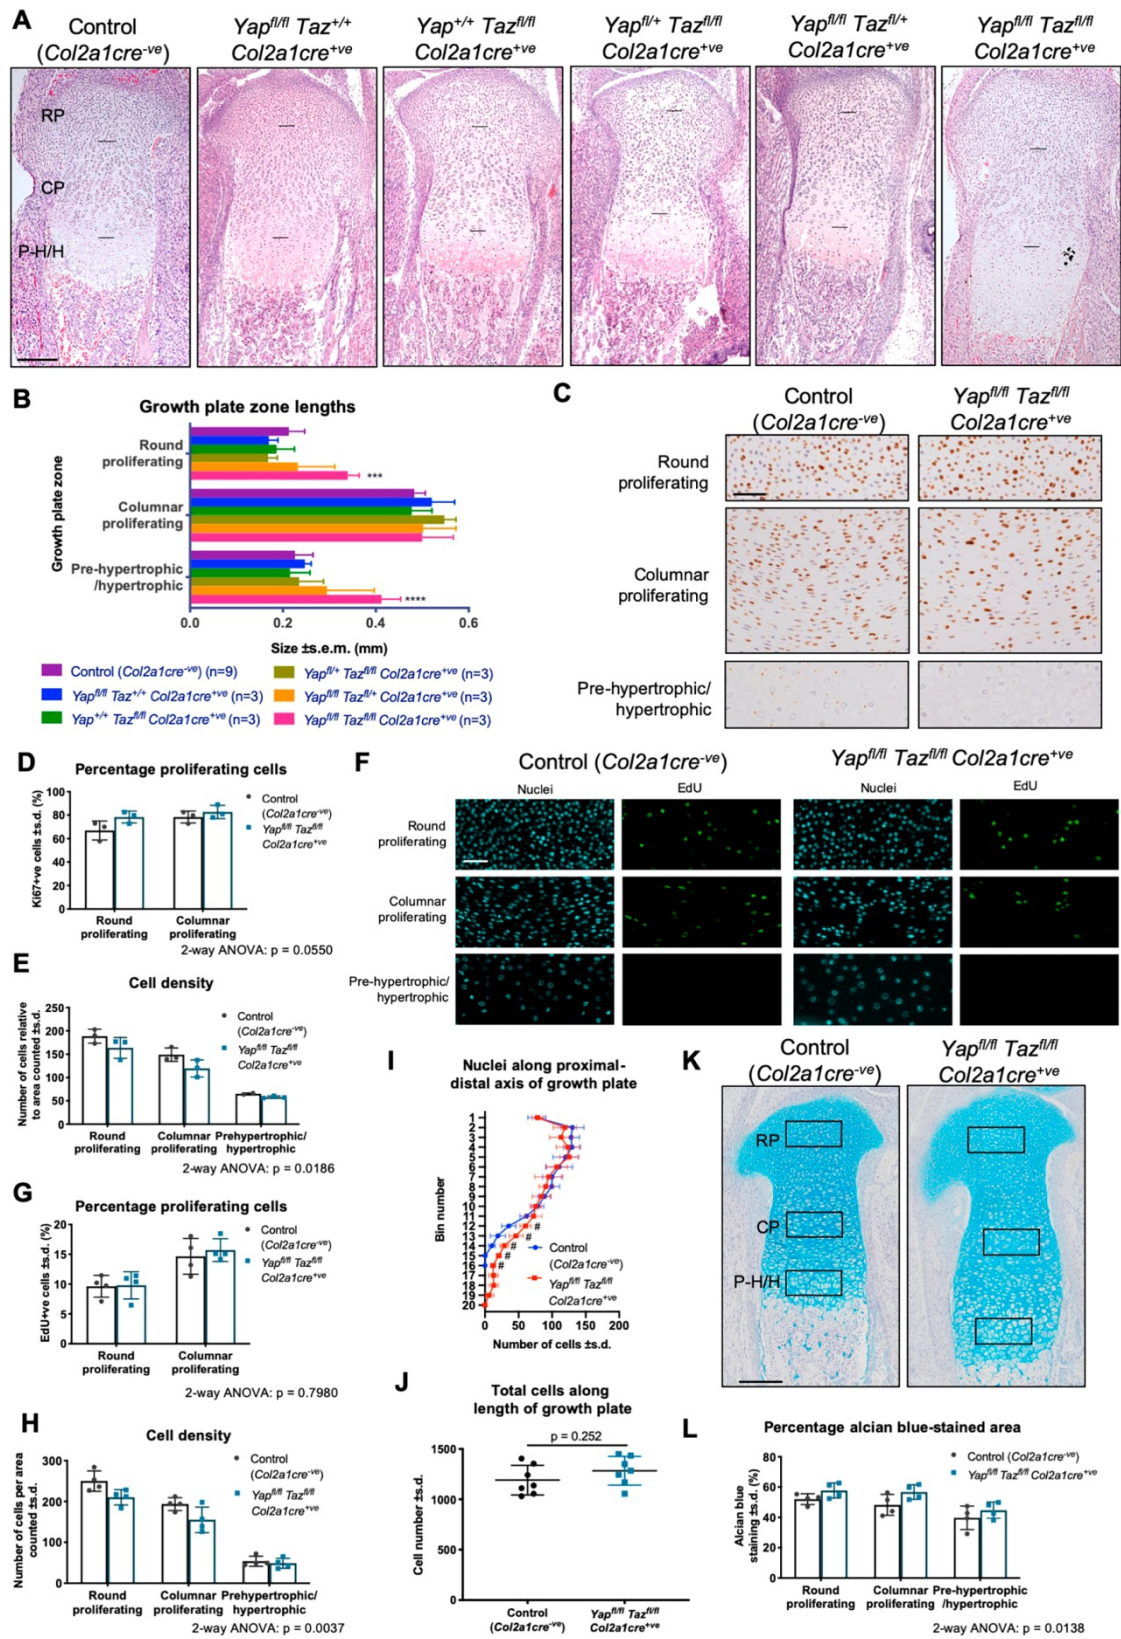

**Figure 4. Elongated growth plate and no change to proliferation in *Yap/Taz* chondrocyte-specific knockout pups.**

A) Haematoxylin and eosin stained histological sections of the proximal growth plate of the tibia of E17.5 pups. Horizontal black lines demarcate the borders of the round proliferative (RP), columnar proliferating (CP) and pre-hypertrophic/hypertrophic (P-H/H) zones. Note the elongated growth plate in the *Yap<sup>fl/fl</sup>Taz<sup>fl/fl</sup>Col2a1cre<sup>+ve</sup>* mutants compared to all other genotypes.

B) Measurements of growth plate zones, analysed by two-way ANOVA followed by Dunnett's multiple comparisons test of each genotype relative to control (*Col2a1cre<sup>-ve</sup>*). N = as indicated in figure legend. \*\*\*,  $p = 0.0004$ ; \*\*\*\*,  $p < 0.0001$ .

C) Immunostaining for Ki67 in the zones of the proximal growth plate of the tibia in  $n = 3$  control (*Col2a1cre<sup>-ve</sup>*) and  $n = 3$  *Yap<sup>fl/fl</sup>Taz<sup>fl/fl</sup>Col2a1cre<sup>+ve</sup>* E17.5 pups.

D,E) Quantification of proliferating cells (D) and cell density (E) of samples from C). Data were analysed by 2-way ANOVA, with growth plate zone and genotype as the independent variables, percentage proliferating cells (D) or cell number (E) as the dependent variable. The effect of genotype on proliferation (D) was not significant ( $p = 0.0550$ ) and effect of genotype on cell density (E) was significant ( $p = 0.0186$ ).  $n = 3$  sections per growth plate per genotype.

F) Fluorescent immunostaining for nuclei (cyan) and EdU (green) in the zones of the proximal growth plate of the tibia in  $n = 4$  control (*Col2a1cre<sup>-ve</sup>*) and  $n = 4$  *Yap<sup>fl/fl</sup>Taz<sup>fl/fl</sup>Col2a1cre<sup>+ve</sup>* E17.5 pups collected two hours after injection of dams with EdU.  $n = 3$  sections per growth plate per genotype.

G,H) Quantification of the percentage of proliferating cells (G) and cell density (H) of samples from F). Data were analysed by 2-way ANOVA, with growth plate zone and genotype as the independent variables, percentage proliferating cells (G) or cell number (H) as the dependent variable. The effect of genotype on proliferation (G) was not significant ( $p = 0.7980$ ) and effect of genotype on cell density (H) was significant ( $p = 0.0037$ ).

I,J) Quantification of cell number along longitudinal length of growth plate, either binned (I) or total (J). Data were analysed by multiple t-tests and corrected for multiple testing (I; # indicates adjusted  $p < 0.01$ ) or unpaired t-test (J;  $p = 0.252$ ). N = 7 per genotype.

K) Alcian blue staining of proximal growth plate of the tibia in n = 4 control (*Col2a1cre*<sup>-ve</sup>) and n = 4 *Yap*<sup>f/f</sup>*Taz*<sup>f/f</sup>*Col2a1cre*<sup>+ve</sup> E17.5 pups. Boxes, from top to bottom, indicate regions from round proliferating, columnar proliferating and prehypertrophic/hypertrophic zones used for quantifying alcian blue staining.

L) Quantification of percentage area occupied by extracellular matrix (alcian blue-stained area) per boxed region from I). Data were analysed by 2-way ANOVA, with growth plate zone and genotype as the independent variables, percentage area alcian blue stained as the dependent variable. The effect of genotype on percentage alcian blue-stained area was significant (p = 0.0138).

Scale bar = 200 μm (A,K), 50 μm (C,F).



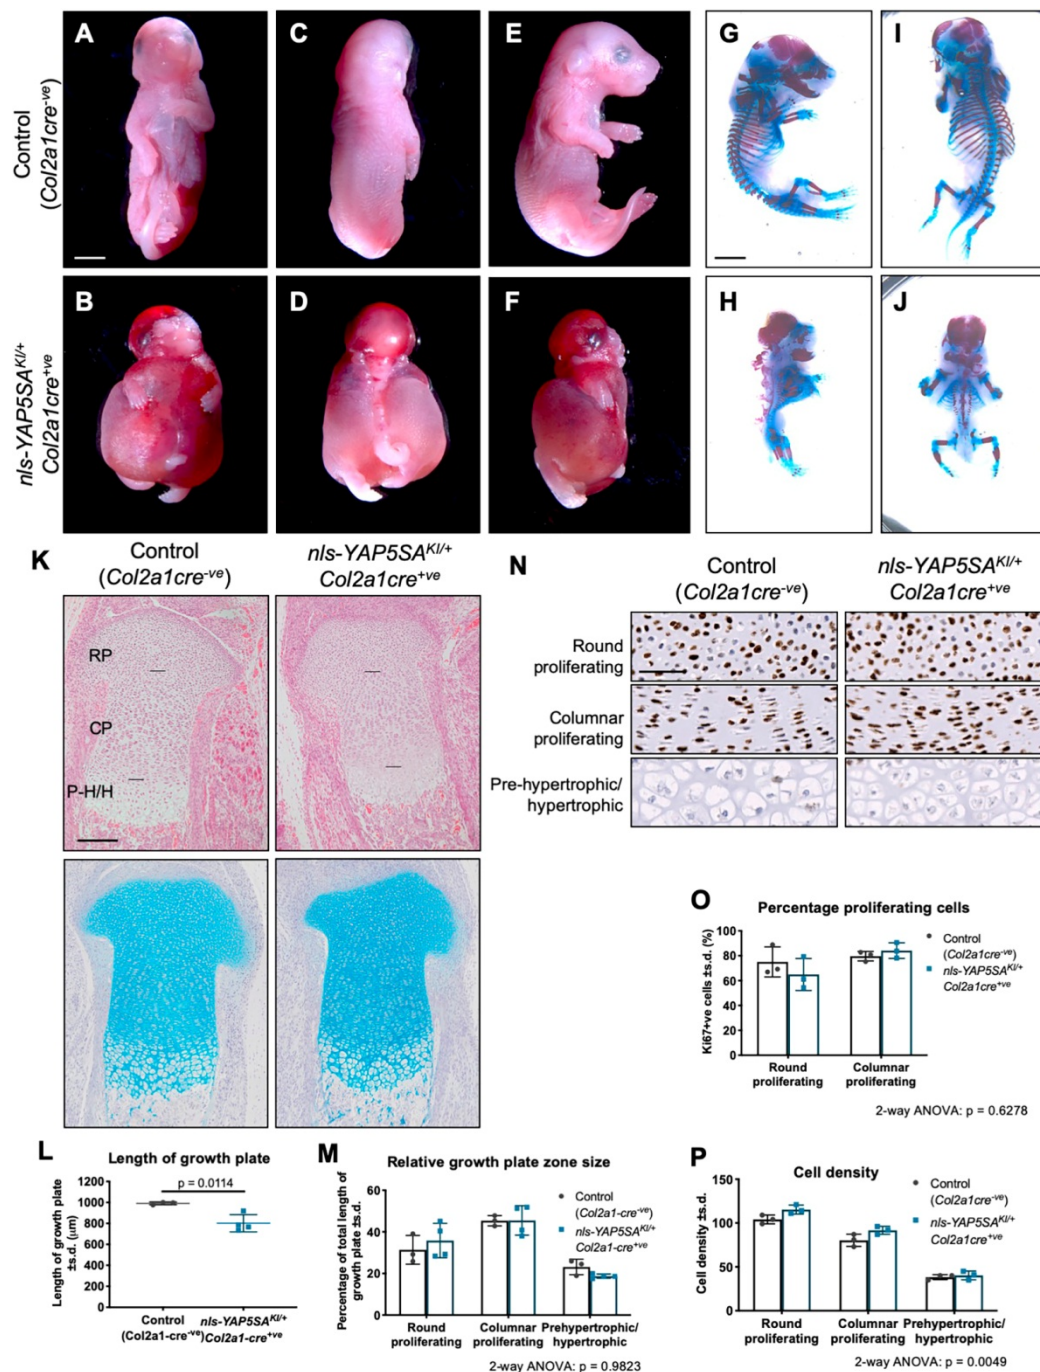

**Figure 5. Severe chondrodysplasia in pups with constitutively nuclear YAP in chondrocytes.**

A-F) Ventral (A,B), dorsal (C,D) and lateral (E,F) views of control (*Col2a1cre<sup>-ve</sup>*) (A,C,E) and *nls-YAP5SA<sup>KI/+</sup>Col2a1cre<sup>+ve</sup>* (B,D,F) E17.5 pups.

(G-J) Lateral (G,H) and dorsal (I,J) views of skeletal preparations of control (*Col2a1cre<sup>-ve</sup>*) (G,I) and *nls-YAP5SA<sup>KI/+</sup>Col2a1cre<sup>+ve</sup>* (H,J) E17.5 pups.

K) Haematoxylin and eosin (upper) and alcian blue (lower) stained histological sections of the proximal growth plate of the tibia of  $n = 3$  control ( $Col2a1cre^{-ve}$ ) and  $n = 3-4$   $nls-YAP5SA^{KI/+}Col2a1cre^{+ve}$  E17.5 pups. Horizontal black lines demarcate the borders of the round proliferative (RP), columnar proliferating (CP) and pre-hypertrophic/hypertrophic (P-H/H) zones.

L,M) Quantification of the length of the growth plate (L) and length of each growth plate zone relative to the total length of the growth plate (M) in  $n = 3$  control ( $Col2a1cre^{-ve}$ ) and  $n = 4$   $nls-YAP5SA^{KI/+}Col2a1cre^{+ve}$  E17.5 pups. Data were analysed by unpaired t-test (L) and 2-way ANOVA with growth plate zone and genotype as the independent variables, relative zone size as the dependent variable (M). The effect of genotype on relative zone size was not significant ( $p = 0.9823$ ).

N) Immunostaining for Ki67 in the zones of the proximal growth plate of the tibia. Data are representative of  $n = 3$  control ( $Col2a1cre^{-ve}$ ) and  $n = 4$   $nls-YAP5SA^{KI/+}Col2a1cre^{+ve}$  E17.5 pups.

O,P) Quantification of proliferating cells (O) and cell density (P) of samples from F). Data were analysed by 2-way ANOVA with growth plate zone and genotype as the independent variables, percentage proliferating cells (O) or cell number (P) as the dependent variable. The effect of genotype on proliferation (O) was not significant ( $p = 0.6278$ ) and effect of genotype on cell density (P) was significant ( $p = 0.0049$ ).

Scale bar = 3 mm (A-J), 200  $\mu$ m (K upper) 170  $\mu$ m (K lower), 50  $\mu$ m (N).

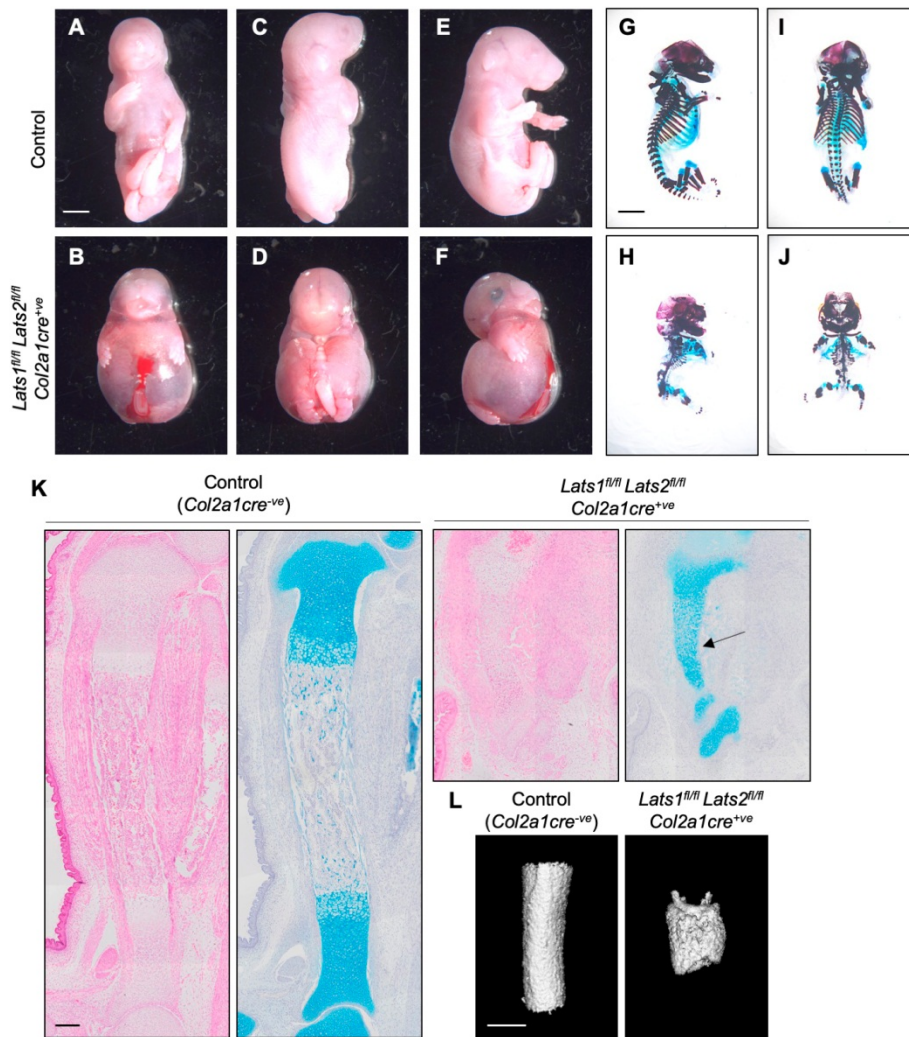

**Figure 6. Severe chondrodysplasia in *Lats1/2* chondrocyte-specific knockout pups.**

A-F) Ventral (A,B), dorsal (C,D) and lateral (E,F) views of control (*Col2a1cre<sup>-ve</sup>*) (A,C,E) and *Lats1<sup>fl/fl</sup> Col2a1cre<sup>+ve</sup>* (B,D,F) E18.5 pups.

G-J) Lateral (G,H) and dorsal (I,J) views of skeletal preparations of control (*Lats1<sup>fl/+</sup> Lats2<sup>fl/fl</sup> Col2a1cre<sup>+ve</sup>*) (G,I) and *Lats1<sup>fl/fl</sup> Col2a1cre<sup>+ve</sup>* (H,J) E17.5 pups.

K) Haematoxylin and eosin (left image per genotype) and alcian blue (right image per genotype) stained histological sections of the proximal growth plate of the tibia.

Data are representative of n = 3 control (*Col2a1cre<sup>-ve</sup>*) and n = 3

*Lats1<sup>fl/fl</sup> Col2a1cre<sup>+ve</sup>* E17.5 pups.

L) Measurements of femurs and tibias from μCT analysis of n = 3 control (*Col2a1cre<sup>-ve</sup>*) and 3 *Yap<sup>fl/fl</sup> Taz<sup>fl/fl</sup> Col2a1cre<sup>+ve</sup>* pups.

Scale bar = 3 mm (A-J), 200 μm (K).



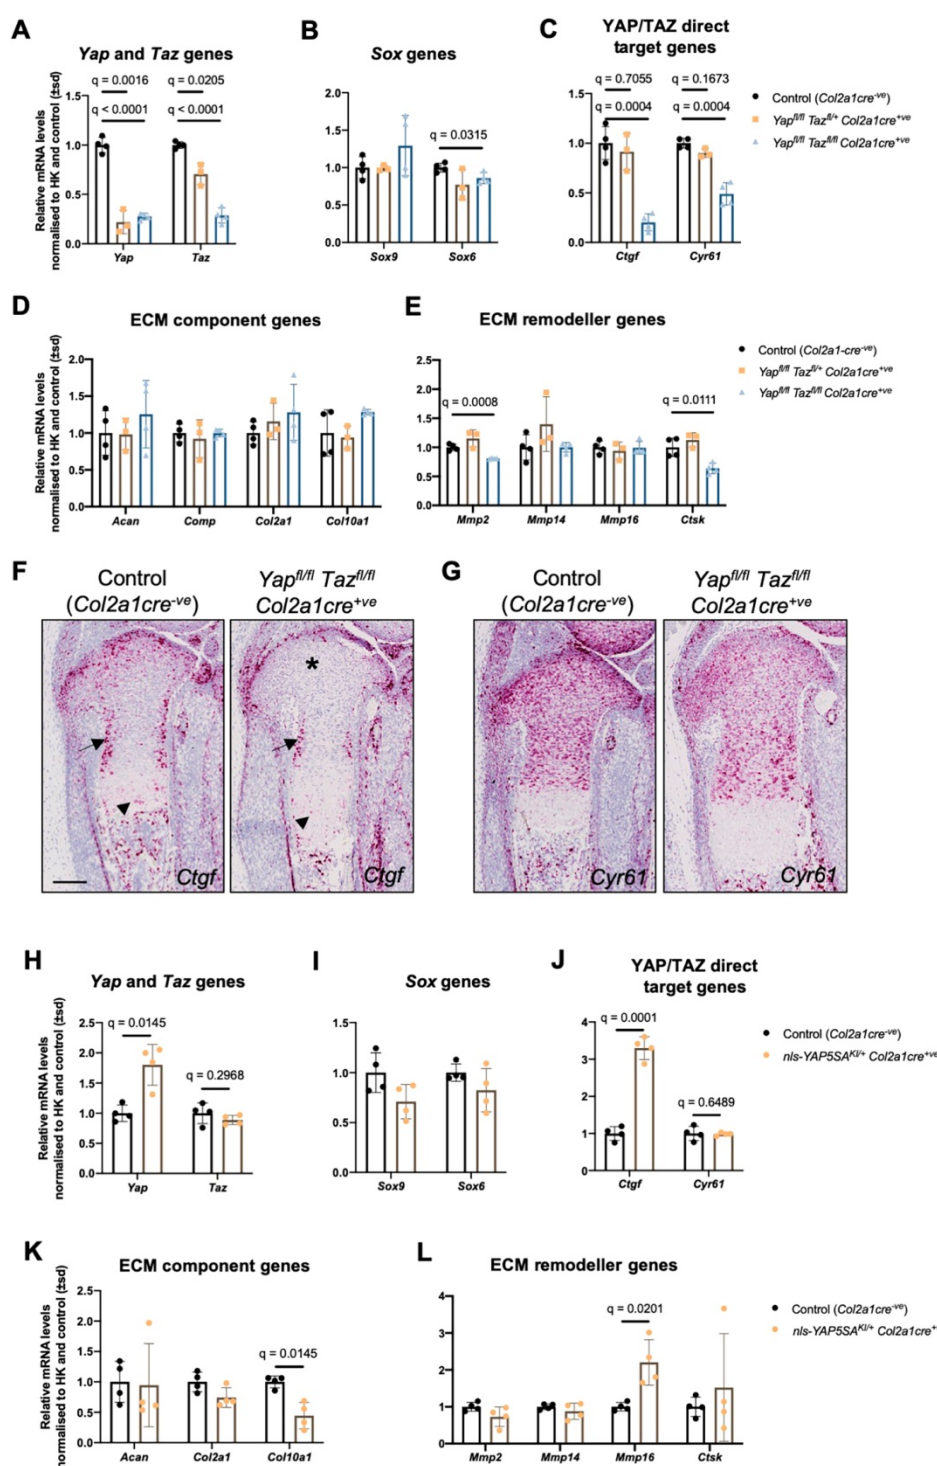

**Figure 7. YAP/TAZ modulation affects expression of ECM remodeller genes.**

A-E RTqPCR analysis of laser-microdissected tibial growth plates of 4 E17.5 *Yap<sup>fl/fl</sup> Taz<sup>fl/fl</sup> Col2a1cre<sup>+ve</sup>* mutants compared to 4 control (*Col2a1cre<sup>-ve</sup>*) and 3 *Yap<sup>fl/fl</sup> Taz<sup>fl/+</sup> Col2a1cre<sup>+ve</sup>* littermates, *Yap* and *Taz* (A) and their known target genes *Ctgf* and *Cyr61* (B) were analysed, along with selected Sox genes (C) and genes

encoding cartilage ECM components (D) and remodellers (E). Data were analysed by t-tests comparing each mutant to control and adjusted for multiple testing with a 5% false discovery rate. Discoveries are given as q values. The absence of a q value indicates q was not statistically significant ( $q > 0.05$ ).

F,G) RNA *in situ* hybridisation to known YAP/TAZ target genes *Ctgf* (F) and *Cyr61* (G). *Ctgf* displays a substantial reduction of signal in the tibial growth plate in the absence of *Yap/Taz* (star in F) though some expression persists adjacent to the perichondrium (arrows in F) and moderate reduction in signal is observed in the hypertrophic zone (arrowheads in F). *Cyr61* signal is generally reduced in *Yap/Taz* mutant growth plates compared to controls (G).  $n = 4$  control (*Col2a1cre*<sup>-ve</sup>) and 4 *Yap*<sup>f/f</sup>*Taz*<sup>f/f</sup>*Col2a1cre*<sup>+ve</sup> tibial growth plates.

H-L) RTqPCR analysis of laser-microdissected tibial growth plates of 4 E17.5 control (*Col2a1cre*<sup>-ve</sup>) and 4 *nls-YAP5SA*<sup>Kl/+</sup>*Col2a1cre*<sup>+ve</sup> littermates. *Yap* and *Taz* (H) and their known target genes *Ctgf* and *Cyr61* (I) were analysed, along with selected Sox genes (J) and genes encoding cartilage ECM components (K) and remodellers (L). Data were analysed by multiple t-tests and adjusted for multiple testing with a 5% false discovery rate. Discoveries are given as q values. The absence of a q value indicates q was not statistically significant ( $q \geq 0.05$ ).

Scale bar: 100  $\mu$ m (F,G).

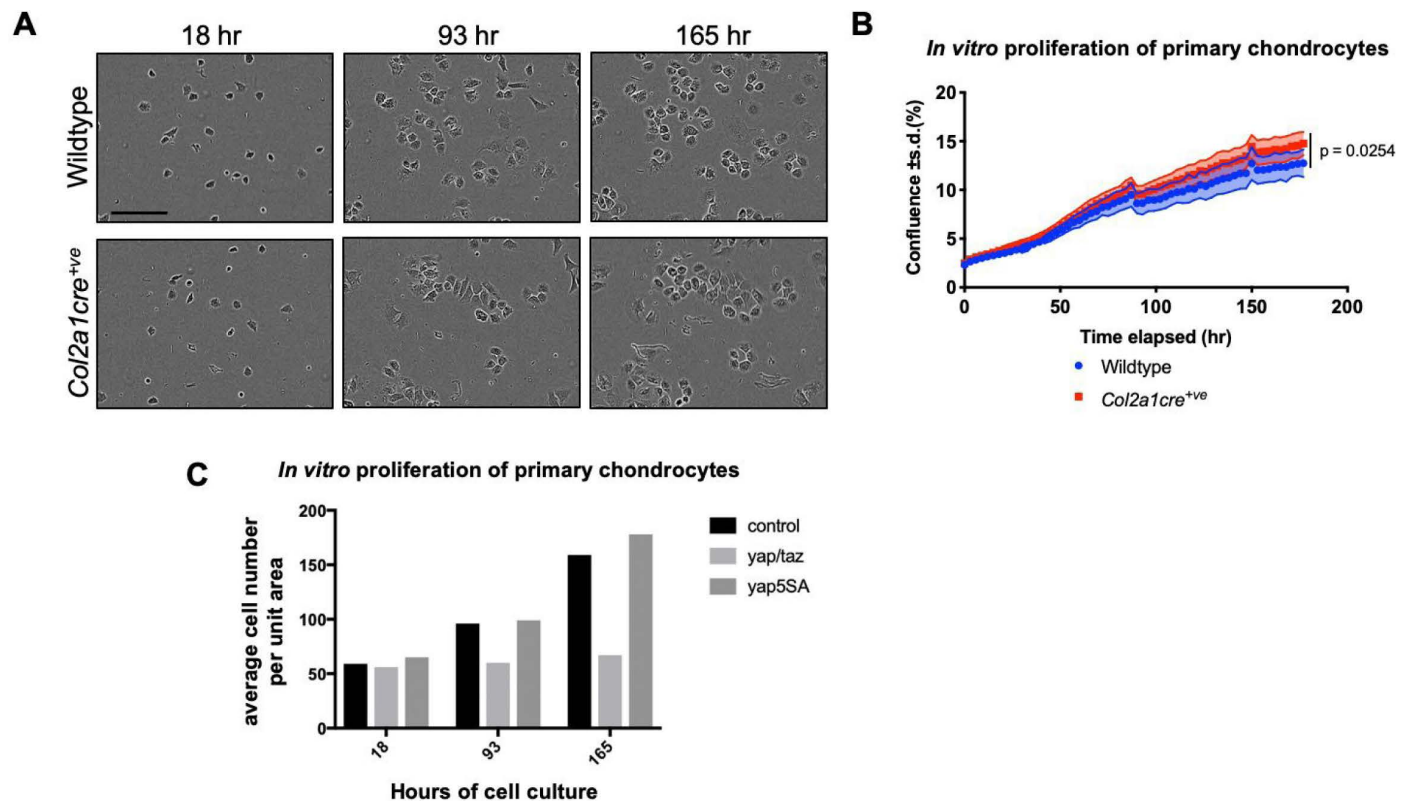

**Figure S1. The *Col2a1cre* allele slightly increases the rate of primary chondrocyte proliferation.**

A) Primary chondrocyte cultures from ribcages and sternae of wild-type (*Col2a1cre<sup>-ve</sup>*) and *Col2a1cre<sup>+ve</sup>*, E17.5 pups plated at low density (3000 cells per well).

B) Proliferation, measured by confluence (percentage cell coverage) of field of view, of cultures from A). Data represent 6 technical replicates of primary chondrocytes derived from individual pups (biological replicates) of the indicated genotype and are representative of 4 independent experiments.

C) Quantification of cell numbers following *in vitro* culture of primary chondrocytes from control (*Col2a1cre<sup>-ve</sup>*), *Yap/Taz* double homozygous floxed animals, and nlsYap5SA expressing animals. Related to Figure 1.

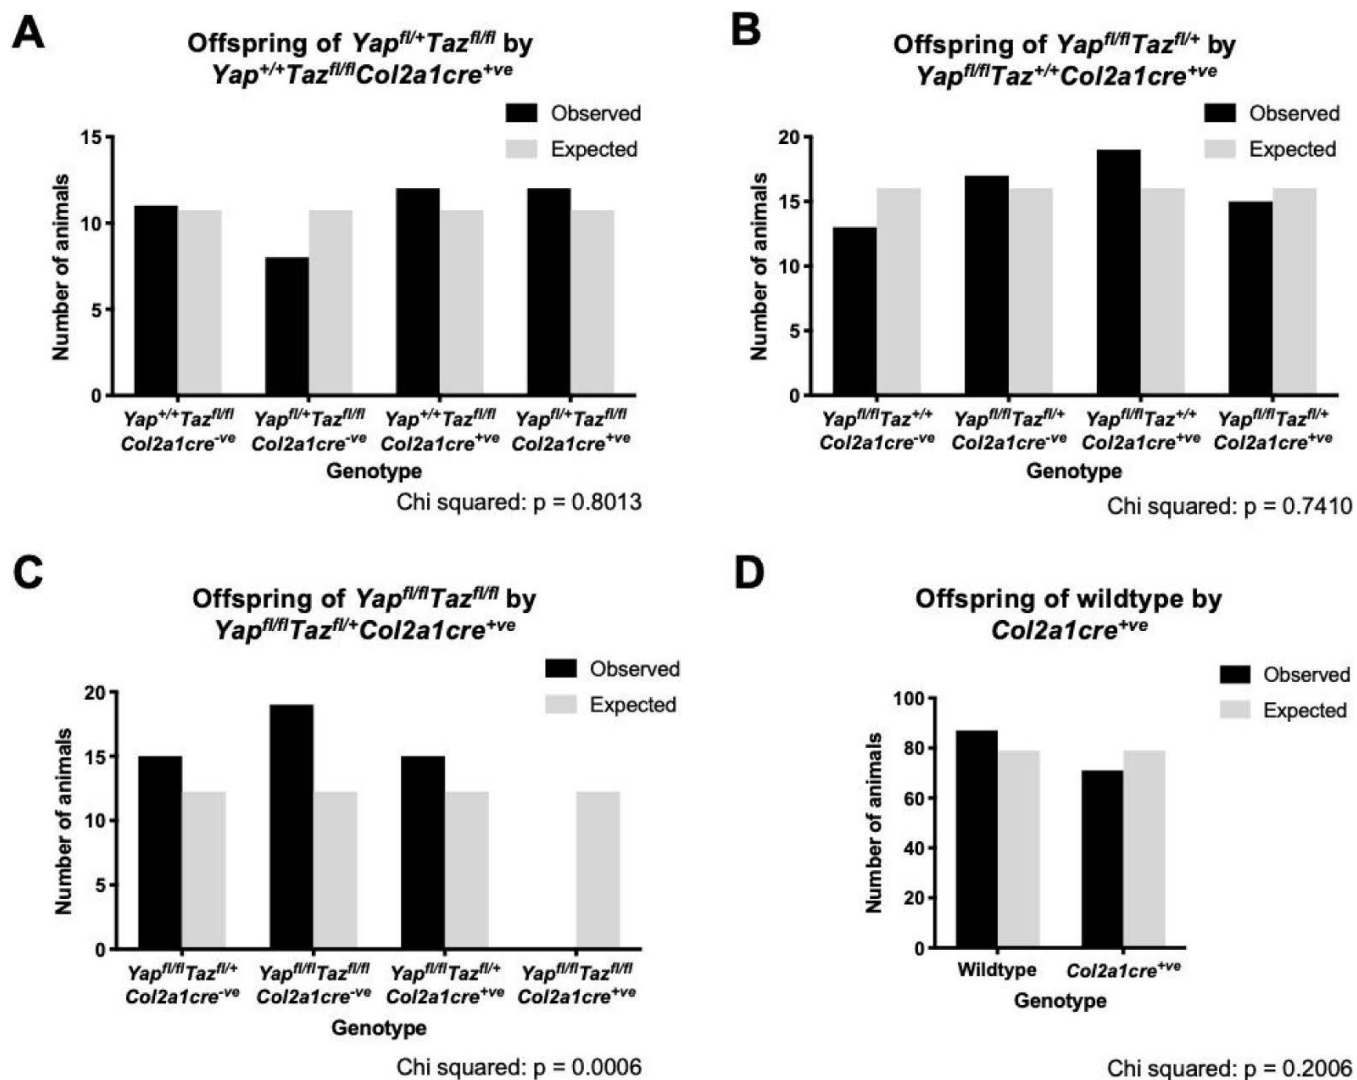

**Figure S2. *Yap/Taz* double conditional mutants are not present at weaning.**

A-D) Number of offspring of the indicated genotypes observed in crosses, versus the expected mendelian ratio. Note the absence of the *Yap/Taz* double homozygous floxed animals in the presence of *Col2a1cre*.



A

DAPI/YAP

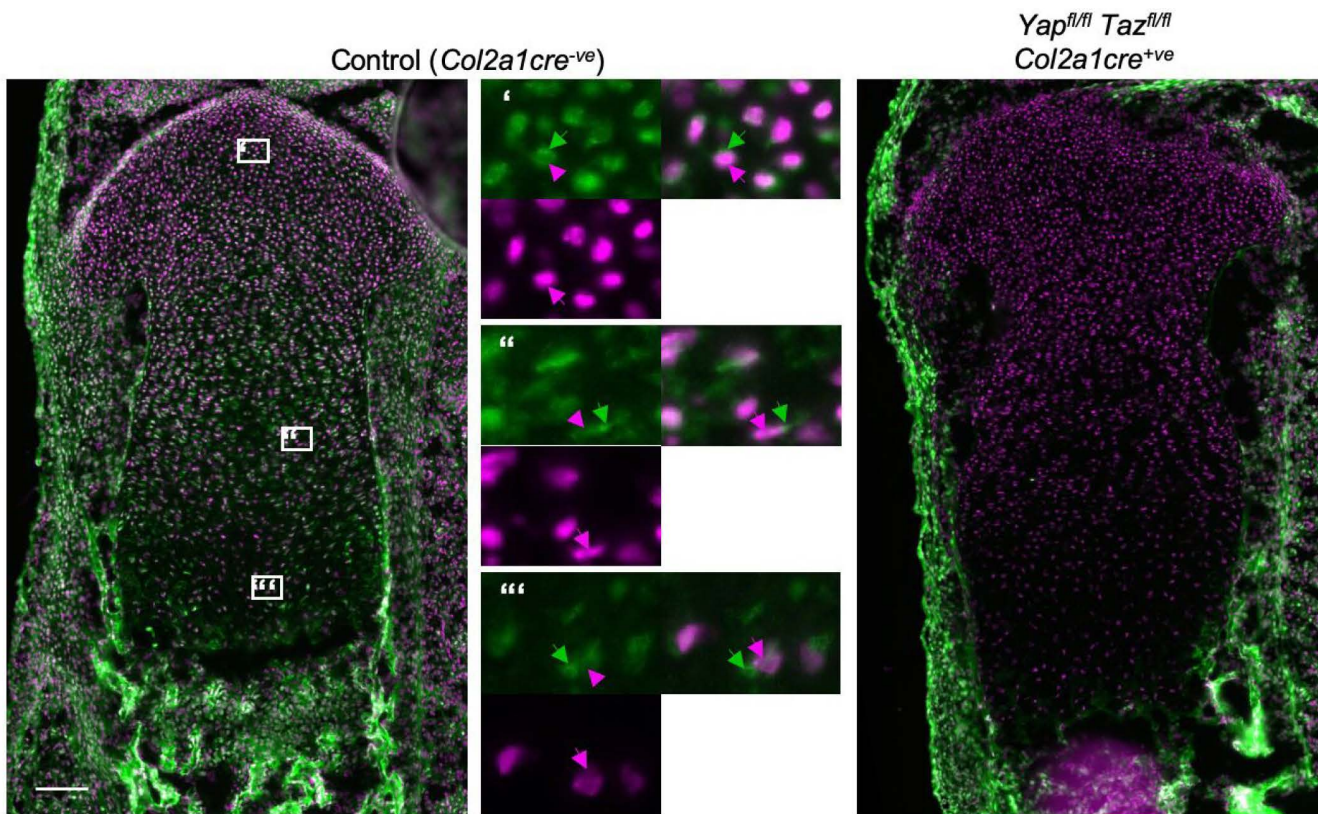

B

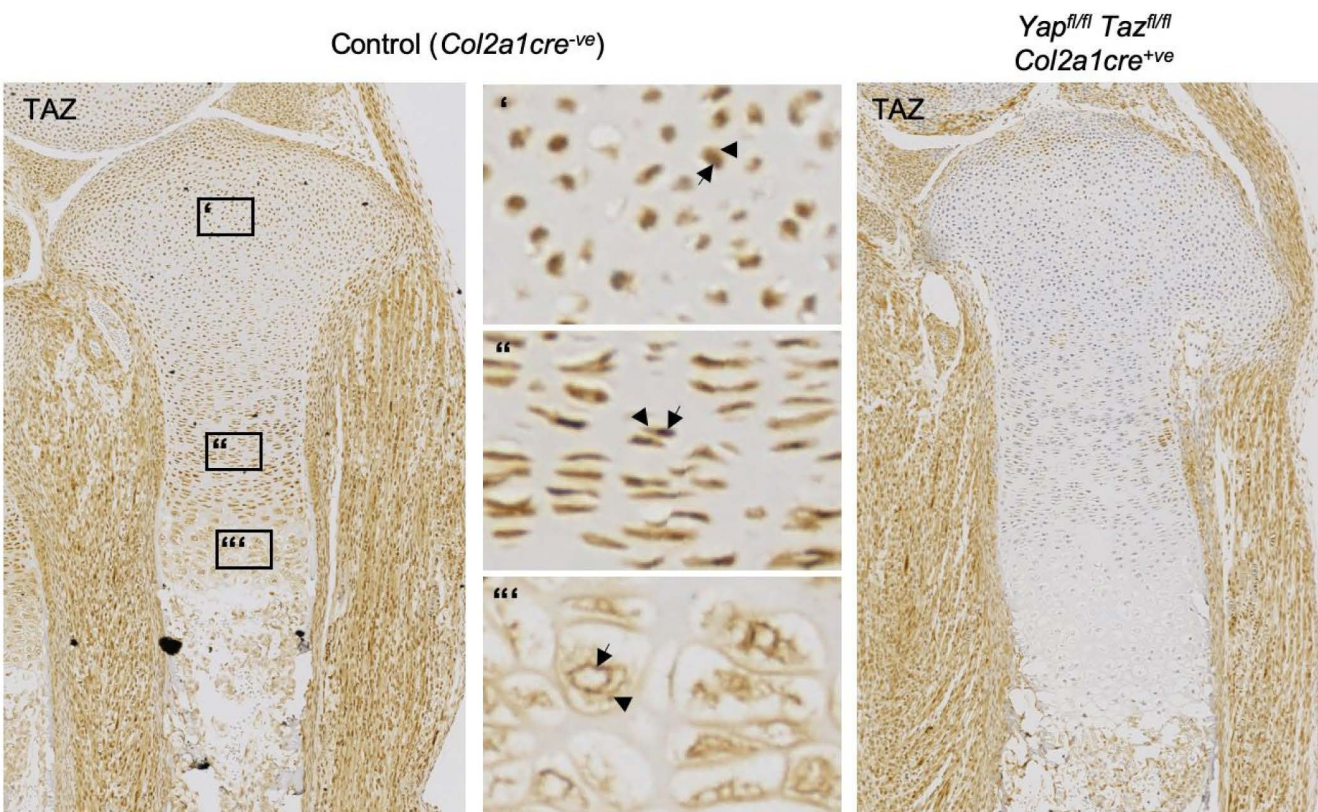

**Figure S3. Growth plate expression of YAP and TAZ.**

A) YAP immunostaining (green) is present in the nucleus and cytoplasm of control tibial growth plates but not in the *Yap/Taz* double homozygous floxed animals in the presence of *Col2a1cre*. DAPI (purple) marks nuclei.

B) TAZ immunostaining (brown) is present in the nucleus and cytoplasm of control tibial growth plates but not in the *Yap/Taz* double homozygous floxed animals in the presence of *Col2a1cre*. Eosin (light blue) marks nuclei.

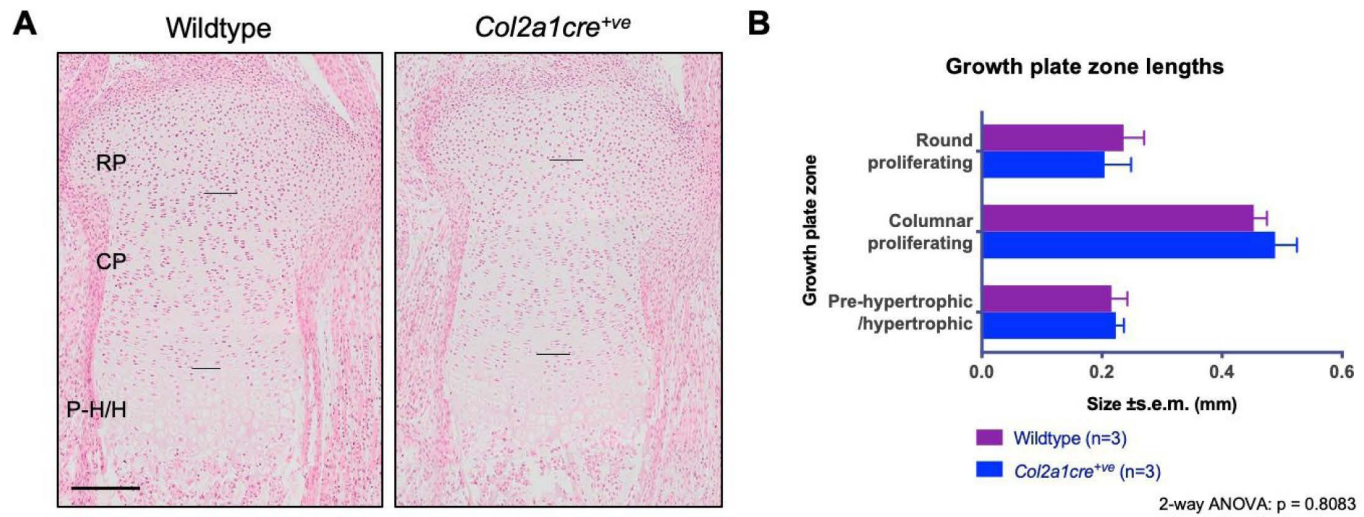

**Figure S4. The *Col2a1cre* allele does not affect tibial growth plate zone size.**

A) Tibial growth plates from both Wildtype and *Col2a1cre* positive animals show no differences in growth plate size.

B) Quantification of zone lengths in A.



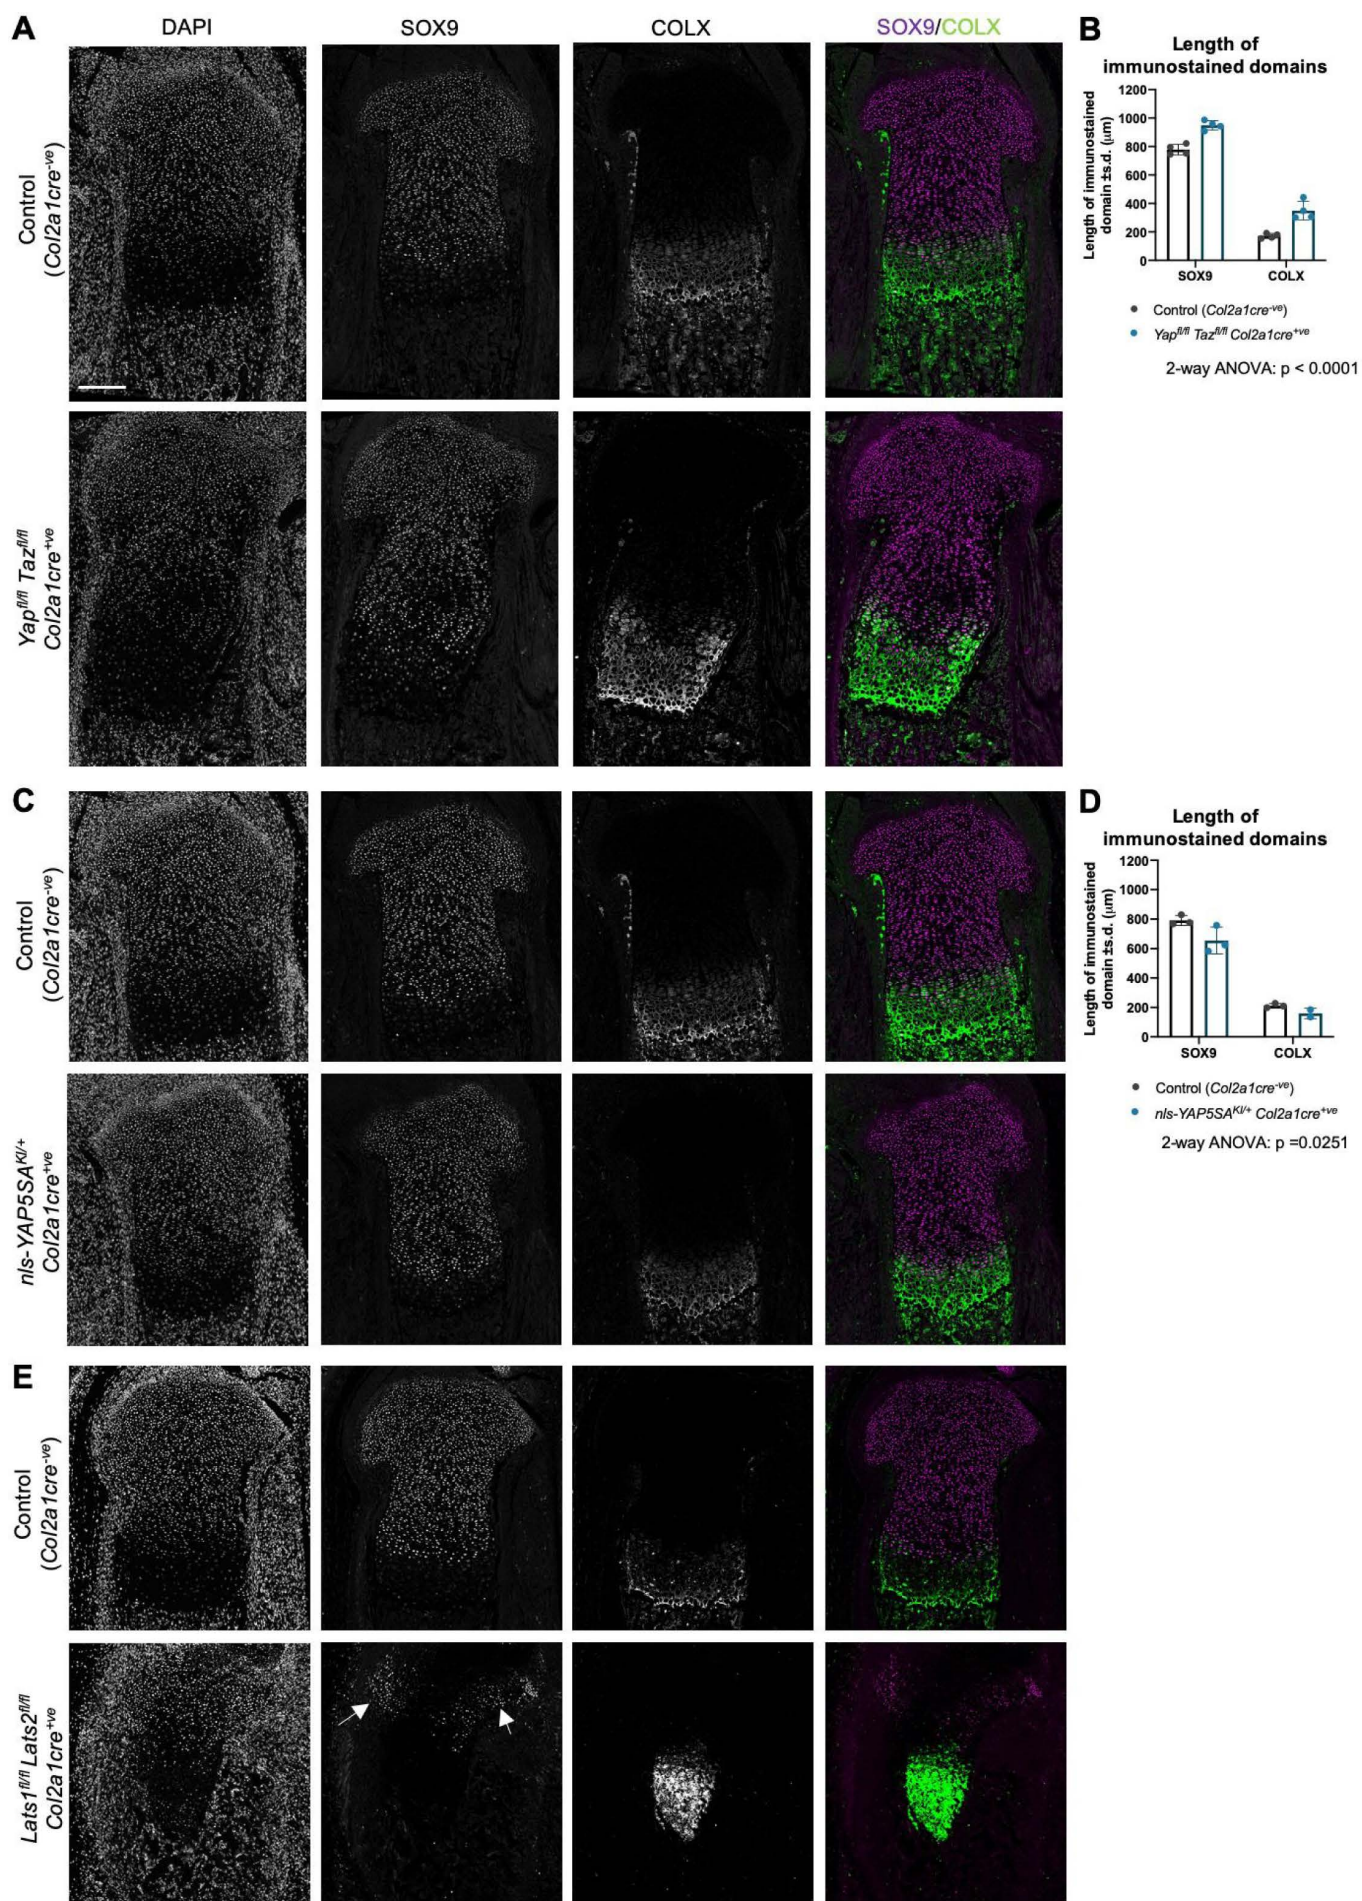

**Figure S5. Chondrocyte marker expression in YAP/TAZ-modulated chondrocytes**

- A) Cartilage-specific double knockout of Yap/Taz does not affect expression of SOX9 or COLX in tibial growth plates.
- B) Cartilage-specific double knockout of Yap/Taz increases the length of the immunostained domains in growth plates, consistent with reduced cell density.
- C) Cartilage-specific expression of active nlsYAP<sup>5SA</sup> does not affect expression of SOX9 or COLX in tibial growth plates.
- D) Cartilage-specific expression of active nlsYAP<sup>5SA</sup> decreases the length of the immunostained domains in growth plates, consistent with increased cell density.
- E) Cartilage-specific double knockout of *Lats1/2* reduces overall size and reduces SOX9 expression levels, which may reflect a very strong activation of both YAP and TAZ.
